# Supplementary material
Source: PubMed Central journal article supplement (PMC4380150)
Supplement: NIHMS670337-supplement-supplement.pdf [file NIHMS670337-supplement-supplement.pdf]

```

library(psych)
library(car)

##
## Attaching package: 'car'
##
## The following object is masked from 'package:psych':
##
##      logit

setwd("/Users/Anissa/Dropbox/school/Projects/volunteer/c x work/SPAN cxwork/")
load("/Users/Anissa/Dropbox/school/Projects/volunteer/c x work/SPAN cxwork/SPAN.RData")
save.image("/Users/Anissa/Dropbox/school/Projects/volunteer/c x work/SPAN cxwork/SPAN.RData")

# reliabilities
alpha(subset(SPAN, select = c(PNEOC11, PNEOC12, PNEOC13, PNEOC14, PNEOC15, PNEOC16,
  PNEOC17, PNEOC18, PNEOC21, PNEOC22, PNEOC23, PNEOC24, PNEOC25, PNEOC26,
  PNEOC27, PNEOC28, PNEOC31, PNEOC32, PNEOC33, PNEOC34, PNEOC35, PNEOC36,
  PNEOC37, PNEOC38, PNEOC41, PNEOC42, PNEOC43, PNEOC44, PNEOC45, PNEOC46,
  PNEOC47, PNEOC48, PNEOC51, PNEOC52, PNEOC53, PNEOC54, PNEOC55, PNEOC56,
  PNEOC57, PNEOC58, PNEOC61, PNEOC62, PNEOC63, PNEOC64, PNEOC65, PNEOC66,
  PNEOC67, PNEOC68)))

##
## Reliability analysis
## Call: alpha(x = subset(SPAN, select = c(PNEOC11, PNEOC12, PNEOC13,
##     PNEOC14, PNEOC15, PNEOC16, PNEOC17, PNEOC18, PNEOC21, PNEOC22,
##     PNEOC23, PNEOC24, PNEOC25, PNEOC26, PNEOC27, PNEOC28, PNEOC31,
##     PNEOC32, PNEOC33, PNEOC34, PNEOC35, PNEOC36, PNEOC37, PNEOC38,
##     PNEOC41, PNEOC42, PNEOC43, PNEOC44, PNEOC45, PNEOC46, PNEOC47,
##     PNEOC48, PNEOC51, PNEOC52, PNEOC53, PNEOC54, PNEOC55, PNEOC56,
##     PNEOC57, PNEOC58, PNEOC61, PNEOC62, PNEOC63, PNEOC64, PNEOC65,
##     PNEOC66, PNEOC67, PNEOC68)))
##
##      raw_alpha std.alpha G6(smc) average_r S/N      ase mean  sd
##      0.89      0.9      0.92      0.16  9 0.0045  2.6 0.36
##
##      lower alpha upper      95% confidence boundaries
## 0.88 0.89 0.9
##
## Reliability if an item is dropped:
##      raw_alpha std.alpha G6(smc) average_r S/N alpha se
## PNEOC11      0.89      0.9      0.91      0.16 8.9  0.0046
## PNEOC12      0.89      0.9      0.92      0.16 9.0  0.0045
## PNEOC13      0.89      0.9      0.91      0.16 8.7  0.0046
## PNEOC14      0.89      0.9      0.91      0.16 8.7  0.0046

```

|            |      |     |      |      |     |        |
|------------|------|-----|------|------|-----|--------|
| ## PNEOC15 | 0.89 | 0.9 | 0.91 | 0.16 | 8.7 | 0.0046 |
| ## PNEOC16 | 0.89 | 0.9 | 0.91 | 0.16 | 8.7 | 0.0046 |
| ## PNEOC17 | 0.89 | 0.9 | 0.91 | 0.16 | 8.7 | 0.0046 |
| ## PNEOC18 | 0.89 | 0.9 | 0.91 | 0.15 | 8.6 | 0.0046 |
| ## PNEOC21 | 0.89 | 0.9 | 0.92 | 0.16 | 9.1 | 0.0045 |
| ## PNEOC22 | 0.89 | 0.9 | 0.91 | 0.16 | 8.8 | 0.0046 |
| ## PNEOC23 | 0.89 | 0.9 | 0.91 | 0.16 | 8.8 | 0.0046 |
| ## PNEOC24 | 0.89 | 0.9 | 0.91 | 0.16 | 8.9 | 0.0046 |
| ## PNEOC25 | 0.89 | 0.9 | 0.91 | 0.15 | 8.6 | 0.0047 |
| ## PNEOC26 | 0.89 | 0.9 | 0.92 | 0.16 | 9.0 | 0.0045 |
| ## PNEOC27 | 0.89 | 0.9 | 0.92 | 0.16 | 9.1 | 0.0045 |
| ## PNEOC28 | 0.89 | 0.9 | 0.91 | 0.16 | 8.8 | 0.0046 |
| ## PNEOC31 | 0.89 | 0.9 | 0.91 | 0.16 | 8.9 | 0.0046 |
| ## PNEOC32 | 0.89 | 0.9 | 0.91 | 0.16 | 8.7 | 0.0047 |
| ## PNEOC33 | 0.89 | 0.9 | 0.91 | 0.16 | 8.9 | 0.0045 |
| ## PNEOC34 | 0.89 | 0.9 | 0.92 | 0.16 | 9.0 | 0.0045 |
| ## PNEOC35 | 0.89 | 0.9 | 0.91 | 0.16 | 8.7 | 0.0046 |
| ## PNEOC36 | 0.89 | 0.9 | 0.91 | 0.16 | 8.9 | 0.0046 |
| ## PNEOC37 | 0.89 | 0.9 | 0.91 | 0.16 | 8.7 | 0.0046 |
| ## PNEOC38 | 0.89 | 0.9 | 0.91 | 0.16 | 8.9 | 0.0046 |
| ## PNEOC41 | 0.89 | 0.9 | 0.91 | 0.16 | 9.0 | 0.0045 |
| ## PNEOC42 | 0.89 | 0.9 | 0.91 | 0.15 | 8.6 | 0.0047 |
| ## PNEOC43 | 0.89 | 0.9 | 0.91 | 0.16 | 8.8 | 0.0046 |
| ## PNEOC44 | 0.89 | 0.9 | 0.91 | 0.16 | 8.6 | 0.0046 |
| ## PNEOC45 | 0.89 | 0.9 | 0.91 | 0.16 | 8.9 | 0.0046 |
| ## PNEOC46 | 0.89 | 0.9 | 0.91 | 0.16 | 8.7 | 0.0046 |
| ## PNEOC47 | 0.89 | 0.9 | 0.91 | 0.16 | 8.7 | 0.0046 |
| ## PNEOC48 | 0.89 | 0.9 | 0.92 | 0.16 | 9.0 | 0.0045 |
| ## PNEOC51 | 0.89 | 0.9 | 0.91 | 0.16 | 8.7 | 0.0047 |
| ## PNEOC52 | 0.89 | 0.9 | 0.91 | 0.16 | 8.7 | 0.0047 |
| ## PNEOC53 | 0.89 | 0.9 | 0.91 | 0.15 | 8.6 | 0.0047 |
| ## PNEOC54 | 0.89 | 0.9 | 0.91 | 0.15 | 8.6 | 0.0047 |
| ## PNEOC55 | 0.89 | 0.9 | 0.91 | 0.15 | 8.6 | 0.0047 |
| ## PNEOC56 | 0.89 | 0.9 | 0.91 | 0.16 | 8.7 | 0.0046 |
| ## PNEOC57 | 0.89 | 0.9 | 0.91 | 0.16 | 8.7 | 0.0047 |
| ## PNEOC58 | 0.89 | 0.9 | 0.91 | 0.15 | 8.6 | 0.0047 |
| ## PNEOC61 | 0.89 | 0.9 | 0.91 | 0.16 | 8.9 | 0.0045 |
| ## PNEOC62 | 0.89 | 0.9 | 0.91 | 0.16 | 8.7 | 0.0046 |
| ## PNEOC63 | 0.89 | 0.9 | 0.91 | 0.16 | 8.8 | 0.0046 |
| ## PNEOC64 | 0.89 | 0.9 | 0.91 | 0.16 | 8.8 | 0.0046 |
| ## PNEOC65 | 0.89 | 0.9 | 0.91 | 0.16 | 9.0 | 0.0045 |
| ## PNEOC66 | 0.89 | 0.9 | 0.91 | 0.16 | 8.8 | 0.0046 |
| ## PNEOC67 | 0.89 | 0.9 | 0.91 | 0.16 | 8.8 | 0.0046 |
| ## PNEOC68 | 0.89 | 0.9 | 0.92 | 0.16 | 9.0 | 0.0045 |
| ##         |      |     |      |      |     |        |

```

## Item statistics
##          n raw.r std.r r.cor r.drop mean  sd
## PNEOC11 1607 0.32 0.33 0.31 0.28 2.8 0.77
## PNEOC12 1607 0.26 0.28 0.24 0.22 3.3 0.79
## PNEOC13 1608 0.45 0.48 0.46 0.42 3.0 0.57
## PNEOC14 1605 0.51 0.51 0.50 0.47 2.5 0.86
## PNEOC15 1607 0.44 0.46 0.44 0.40 2.8 0.71
## PNEOC16 1609 0.45 0.46 0.44 0.41 2.9 0.89
## PNEOC17 1606 0.44 0.46 0.45 0.41 3.0 0.68
## PNEOC18 1604 0.54 0.57 0.56 0.52 3.1 0.62
## PNEOC21 1607 0.23 0.21 0.17 0.17 1.8 1.00
## PNEOC22 1609 0.46 0.45 0.44 0.42 2.5 0.97
## PNEOC23 1605 0.42 0.42 0.40 0.38 2.4 0.92
## PNEOC24 1609 0.34 0.33 0.31 0.29 2.7 0.91
## PNEOC25 1609 0.61 0.59 0.59 0.57 2.6 0.97
## PNEOC26 1598 0.24 0.23 0.20 0.19 1.9 0.96
## PNEOC27 1607 0.18 0.16 0.13 0.13 1.4 1.01
## PNEOC28 1606 0.44 0.43 0.42 0.40 2.3 1.00
## PNEOC31 1609 0.34 0.35 0.33 0.30 3.2 0.74
## PNEOC32 1611 0.52 0.51 0.49 0.47 2.6 1.06
## PNEOC33 1608 0.33 0.33 0.30 0.28 2.9 1.06
## PNEOC34 1603 0.25 0.24 0.21 0.20 2.8 1.04
## PNEOC35 1610 0.46 0.47 0.46 0.42 3.2 0.69
## PNEOC36 1603 0.32 0.33 0.30 0.27 2.7 0.81
## PNEOC37 1607 0.44 0.46 0.45 0.41 3.2 0.56
## PNEOC38 1605 0.35 0.34 0.31 0.29 2.7 1.05
## PNEOC41 1609 0.29 0.28 0.25 0.23 2.2 0.98
## PNEOC42 1610 0.59 0.59 0.58 0.55 2.5 0.90
## PNEOC43 1607 0.41 0.40 0.38 0.36 2.3 0.92
## PNEOC44 1610 0.54 0.55 0.55 0.51 3.1 0.70
## PNEOC45 1609 0.37 0.36 0.34 0.32 2.0 1.05
## PNEOC46 1606 0.50 0.51 0.50 0.46 2.7 0.86
## PNEOC47 1609 0.47 0.48 0.47 0.43 2.6 0.87
## PNEOC48 1605 0.25 0.24 0.21 0.19 1.8 1.13
## PNEOC51 1612 0.53 0.52 0.51 0.48 2.7 0.91
## PNEOC52 1611 0.53 0.52 0.51 0.49 2.6 0.95
## PNEOC53 1609 0.57 0.58 0.58 0.54 2.8 0.74
## PNEOC54 1608 0.61 0.59 0.59 0.57 2.4 0.95
## PNEOC55 1608 0.59 0.60 0.59 0.56 2.9 0.79
## PNEOC56 1607 0.47 0.47 0.46 0.43 2.7 0.82
## PNEOC57 1606 0.52 0.51 0.50 0.48 2.4 0.99
## PNEOC58 1607 0.57 0.57 0.56 0.53 2.5 0.89
## PNEOC61 1611 0.32 0.30 0.27 0.26 1.5 1.03
## PNEOC62 1610 0.46 0.49 0.48 0.43 3.0 0.61
## PNEOC63 1607 0.40 0.39 0.37 0.35 2.0 1.00

```

```

## PNEOC64 1610 0.44 0.45 0.43 0.40 2.4 0.89
## PNEOC65 1608 0.27 0.26 0.23 0.22 2.1 0.94
## PNEOC66 1607 0.41 0.42 0.40 0.37 2.5 0.84
## PNEOC67 1608 0.38 0.39 0.37 0.34 2.8 0.83
## PNEOC68 1607 0.23 0.24 0.20 0.18 2.5 0.79
##
## Non missing response frequency for each item
##      0      1      2      3      4 miss
## PNEOC11 0.01 0.05 0.19 0.62 0.12 0.01
## PNEOC12 0.01 0.03 0.06 0.47 0.43 0.01
## PNEOC13 0.00 0.01 0.09 0.73 0.17 0.01
## PNEOC14 0.01 0.16 0.20 0.57 0.07 0.02
## PNEOC15 0.01 0.04 0.21 0.63 0.11 0.01
## PNEOC16 0.01 0.09 0.08 0.58 0.23 0.01
## PNEOC17 0.00 0.04 0.11 0.67 0.18 0.01
## PNEOC18 0.00 0.02 0.09 0.69 0.19 0.02
## PNEOC21 0.06 0.42 0.23 0.25 0.03 0.01
## PNEOC22 0.02 0.14 0.24 0.47 0.13 0.01
## PNEOC23 0.01 0.17 0.28 0.45 0.09 0.02
## PNEOC24 0.01 0.11 0.19 0.53 0.16 0.01
## PNEOC25 0.03 0.13 0.17 0.54 0.15 0.01
## PNEOC26 0.05 0.33 0.29 0.32 0.02 0.02
## PNEOC27 0.14 0.55 0.12 0.16 0.03 0.01
## PNEOC28 0.03 0.22 0.20 0.48 0.07 0.01
## PNEOC31 0.01 0.02 0.04 0.56 0.36 0.01
## PNEOC32 0.01 0.21 0.11 0.46 0.20 0.01
## PNEOC33 0.02 0.12 0.17 0.38 0.31 0.01
## PNEOC34 0.01 0.15 0.14 0.43 0.27 0.02
## PNEOC35 0.01 0.02 0.06 0.60 0.31 0.01
## PNEOC36 0.01 0.09 0.23 0.57 0.11 0.02
## PNEOC37 0.00 0.01 0.04 0.70 0.24 0.01
## PNEOC38 0.02 0.18 0.10 0.48 0.22 0.02
## PNEOC41 0.02 0.28 0.28 0.36 0.07 0.01
## PNEOC42 0.01 0.16 0.27 0.48 0.08 0.01
## PNEOC43 0.02 0.21 0.29 0.42 0.06 0.01
## PNEOC44 0.00 0.03 0.12 0.61 0.23 0.01
## PNEOC45 0.04 0.38 0.18 0.34 0.05 0.01
## PNEOC46 0.00 0.11 0.22 0.53 0.13 0.01
## PNEOC47 0.01 0.12 0.23 0.53 0.11 0.01
## PNEOC48 0.11 0.38 0.18 0.28 0.05 0.02
## PNEOC51 0.02 0.12 0.12 0.60 0.14 0.01
## PNEOC52 0.02 0.16 0.17 0.53 0.12 0.01
## PNEOC53 0.01 0.05 0.20 0.62 0.13 0.01
## PNEOC54 0.02 0.19 0.19 0.53 0.07 0.01
## PNEOC55 0.01 0.07 0.13 0.62 0.17 0.01

```

```

## PNEOC56 0.01 0.12 0.16 0.63 0.09 0.01
## PNEOC57 0.02 0.25 0.15 0.51 0.07 0.01
## PNEOC58 0.02 0.14 0.24 0.52 0.09 0.01
## PNEOC61 0.11 0.49 0.19 0.16 0.04 0.01
## PNEOC62 0.00 0.02 0.11 0.71 0.16 0.01
## PNEOC63 0.02 0.40 0.21 0.33 0.05 0.01
## PNEOC64 0.01 0.19 0.24 0.50 0.06 0.01
## PNEOC65 0.03 0.29 0.26 0.40 0.03 0.01
## PNEOC66 0.01 0.15 0.20 0.59 0.05 0.01
## PNEOC67 0.01 0.09 0.17 0.58 0.15 0.01
## PNEOC68 0.00 0.13 0.25 0.56 0.05 0.01

alpha(Calpha)

##
## Reliability analysis
## Call: alpha(x = Calpha)
##
##   raw_alpha std.alpha G6(smc) average_r S/N   ase mean  sd
##     0.89      0.9    0.92      0.16   9 0.0045  2.6 0.36
##
##   lower alpha upper      95% confidence boundaries
## 0.88 0.89 0.9
##
## Reliability if an item is dropped:
##   raw_alpha std.alpha G6(smc) average_r S/N alpha se
## PNEOC11    0.89      0.9    0.91      0.16 8.9  0.0046
## PNEOC12    0.89      0.9    0.92      0.16 9.0  0.0045
## PNEOC13    0.89      0.9    0.91      0.16 8.7  0.0046
## PNEOC14    0.89      0.9    0.91      0.16 8.7  0.0046
## PNEOC15    0.89      0.9    0.91      0.16 8.7  0.0046
## PNEOC16    0.89      0.9    0.91      0.16 8.7  0.0046
## PNEOC17    0.89      0.9    0.91      0.16 8.7  0.0046
## PNEOC18    0.89      0.9    0.91      0.15 8.6  0.0046
## PNEOC21    0.89      0.9    0.92      0.16 9.1  0.0045
## PNEOC22    0.89      0.9    0.91      0.16 8.8  0.0046
## PNEOC23    0.89      0.9    0.91      0.16 8.8  0.0046
## PNEOC24    0.89      0.9    0.91      0.16 8.9  0.0046
## PNEOC25    0.89      0.9    0.91      0.15 8.6  0.0047
## PNEOC26    0.89      0.9    0.92      0.16 9.0  0.0045
## PNEOC27    0.89      0.9    0.92      0.16 9.1  0.0045
## PNEOC28    0.89      0.9    0.91      0.16 8.8  0.0046
## PNEOC31    0.89      0.9    0.91      0.16 8.9  0.0046
## PNEOC32    0.89      0.9    0.91      0.16 8.7  0.0047
## PNEOC33    0.89      0.9    0.91      0.16 8.9  0.0045
## PNEOC34    0.89      0.9    0.92      0.16 9.0  0.0045

```

```

## PNEOC35      0.89      0.9      0.91      0.16 8.7      0.0046
## PNEOC36      0.89      0.9      0.91      0.16 8.9      0.0046
## PNEOC37      0.89      0.9      0.91      0.16 8.7      0.0046
## PNEOC38      0.89      0.9      0.91      0.16 8.9      0.0046
## PNEOC41      0.89      0.9      0.91      0.16 9.0      0.0045
## PNEOC42      0.89      0.9      0.91      0.15 8.6      0.0047
## PNEOC43      0.89      0.9      0.91      0.16 8.8      0.0046
## PNEOC44      0.89      0.9      0.91      0.16 8.6      0.0046
## PNEOC45      0.89      0.9      0.91      0.16 8.9      0.0046
## PNEOC46      0.89      0.9      0.91      0.16 8.7      0.0046
## PNEOC47      0.89      0.9      0.91      0.16 8.7      0.0046
## PNEOC48      0.89      0.9      0.92      0.16 9.0      0.0045
## PNEOC51      0.89      0.9      0.91      0.16 8.7      0.0047
## PNEOC52      0.89      0.9      0.91      0.16 8.7      0.0047
## PNEOC53      0.89      0.9      0.91      0.15 8.6      0.0047
## PNEOC54      0.89      0.9      0.91      0.15 8.6      0.0047
## PNEOC55      0.89      0.9      0.91      0.15 8.6      0.0047
## PNEOC56      0.89      0.9      0.91      0.16 8.7      0.0046
## PNEOC57      0.89      0.9      0.91      0.16 8.7      0.0047
## PNEOC58      0.89      0.9      0.91      0.15 8.6      0.0047
## PNEOC61      0.89      0.9      0.91      0.16 8.9      0.0045
## PNEOC62      0.89      0.9      0.91      0.16 8.7      0.0046
## PNEOC63      0.89      0.9      0.91      0.16 8.8      0.0046
## PNEOC64      0.89      0.9      0.91      0.16 8.8      0.0046
## PNEOC65      0.89      0.9      0.91      0.16 9.0      0.0045
## PNEOC66      0.89      0.9      0.91      0.16 8.8      0.0046
## PNEOC67      0.89      0.9      0.91      0.16 8.8      0.0046
## PNEOC68      0.89      0.9      0.92      0.16 9.0      0.0045
##
## Item statistics
##          n raw.r std.r r.cor r.drop mean  sd
## PNEOC11 1607  0.32  0.33  0.31  0.28  2.8 0.77
## PNEOC12 1607  0.26  0.28  0.24  0.22  3.3 0.79
## PNEOC13 1608  0.45  0.48  0.46  0.42  3.0 0.57
## PNEOC14 1605  0.51  0.51  0.50  0.47  2.5 0.86
## PNEOC15 1607  0.44  0.46  0.44  0.40  2.8 0.71
## PNEOC16 1609  0.45  0.46  0.44  0.41  2.9 0.89
## PNEOC17 1606  0.44  0.46  0.45  0.41  3.0 0.68
## PNEOC18 1604  0.54  0.57  0.56  0.52  3.1 0.62
## PNEOC21 1607  0.23  0.21  0.17  0.17  1.8 1.00
## PNEOC22 1609  0.46  0.45  0.44  0.42  2.5 0.97
## PNEOC23 1605  0.42  0.42  0.40  0.38  2.4 0.92
## PNEOC24 1609  0.34  0.33  0.31  0.29  2.7 0.91
## PNEOC25 1609  0.61  0.59  0.59  0.57  2.6 0.97
## PNEOC26 1598  0.24  0.23  0.20  0.19  1.9 0.96

```

```

## PNEOC27 1607 0.18 0.16 0.13 0.13 1.4 1.01
## PNEOC28 1606 0.44 0.43 0.42 0.40 2.3 1.00
## PNEOC31 1609 0.34 0.35 0.33 0.30 3.2 0.74
## PNEOC32 1611 0.52 0.51 0.49 0.47 2.6 1.06
## PNEOC33 1608 0.33 0.33 0.30 0.28 2.9 1.06
## PNEOC34 1603 0.25 0.24 0.21 0.20 2.8 1.04
## PNEOC35 1610 0.46 0.47 0.46 0.42 3.2 0.69
## PNEOC36 1603 0.32 0.33 0.30 0.27 2.7 0.81
## PNEOC37 1607 0.44 0.46 0.45 0.41 3.2 0.56
## PNEOC38 1605 0.35 0.34 0.31 0.29 2.7 1.05
## PNEOC41 1609 0.29 0.28 0.25 0.23 2.2 0.98
## PNEOC42 1610 0.59 0.59 0.58 0.55 2.5 0.90
## PNEOC43 1607 0.41 0.40 0.38 0.36 2.3 0.92
## PNEOC44 1610 0.54 0.55 0.55 0.51 3.1 0.70
## PNEOC45 1609 0.37 0.36 0.34 0.32 2.0 1.05
## PNEOC46 1606 0.50 0.51 0.50 0.46 2.7 0.86
## PNEOC47 1609 0.47 0.48 0.47 0.43 2.6 0.87
## PNEOC48 1605 0.25 0.24 0.21 0.19 1.8 1.13
## PNEOC51 1612 0.53 0.52 0.51 0.48 2.7 0.91
## PNEOC52 1611 0.53 0.52 0.51 0.49 2.6 0.95
## PNEOC53 1609 0.57 0.58 0.58 0.54 2.8 0.74
## PNEOC54 1608 0.61 0.59 0.59 0.57 2.4 0.95
## PNEOC55 1608 0.59 0.60 0.59 0.56 2.9 0.79
## PNEOC56 1607 0.47 0.47 0.46 0.43 2.7 0.82
## PNEOC57 1606 0.52 0.51 0.50 0.48 2.4 0.99
## PNEOC58 1607 0.57 0.57 0.56 0.53 2.5 0.89
## PNEOC61 1611 0.32 0.30 0.27 0.26 1.5 1.03
## PNEOC62 1610 0.46 0.49 0.48 0.43 3.0 0.61
## PNEOC63 1607 0.40 0.39 0.37 0.35 2.0 1.00
## PNEOC64 1610 0.44 0.45 0.43 0.40 2.4 0.89
## PNEOC65 1608 0.27 0.26 0.23 0.22 2.1 0.94
## PNEOC66 1607 0.41 0.42 0.40 0.37 2.5 0.84
## PNEOC67 1608 0.38 0.39 0.37 0.34 2.8 0.83
## PNEOC68 1607 0.23 0.24 0.20 0.18 2.5 0.79
##
## Non missing response frequency for each item
##      0      1      2      3      4 miss
## PNEOC11 0.01 0.05 0.19 0.62 0.12 0.01
## PNEOC12 0.01 0.03 0.06 0.47 0.43 0.01
## PNEOC13 0.00 0.01 0.09 0.73 0.17 0.01
## PNEOC14 0.01 0.16 0.20 0.57 0.07 0.02
## PNEOC15 0.01 0.04 0.21 0.63 0.11 0.01
## PNEOC16 0.01 0.09 0.08 0.58 0.23 0.01
## PNEOC17 0.00 0.04 0.11 0.67 0.18 0.01
## PNEOC18 0.00 0.02 0.09 0.69 0.19 0.02

```

```

## PNEOC21 0.06 0.42 0.23 0.25 0.03 0.01
## PNEOC22 0.02 0.14 0.24 0.47 0.13 0.01
## PNEOC23 0.01 0.17 0.28 0.45 0.09 0.02
## PNEOC24 0.01 0.11 0.19 0.53 0.16 0.01
## PNEOC25 0.03 0.13 0.17 0.54 0.15 0.01
## PNEOC26 0.05 0.33 0.29 0.32 0.02 0.02
## PNEOC27 0.14 0.55 0.12 0.16 0.03 0.01
## PNEOC28 0.03 0.22 0.20 0.48 0.07 0.01
## PNEOC31 0.01 0.02 0.04 0.56 0.36 0.01
## PNEOC32 0.01 0.21 0.11 0.46 0.20 0.01
## PNEOC33 0.02 0.12 0.17 0.38 0.31 0.01
## PNEOC34 0.01 0.15 0.14 0.43 0.27 0.02
## PNEOC35 0.01 0.02 0.06 0.60 0.31 0.01
## PNEOC36 0.01 0.09 0.23 0.57 0.11 0.02
## PNEOC37 0.00 0.01 0.04 0.70 0.24 0.01
## PNEOC38 0.02 0.18 0.10 0.48 0.22 0.02
## PNEOC41 0.02 0.28 0.28 0.36 0.07 0.01
## PNEOC42 0.01 0.16 0.27 0.48 0.08 0.01
## PNEOC43 0.02 0.21 0.29 0.42 0.06 0.01
## PNEOC44 0.00 0.03 0.12 0.61 0.23 0.01
## PNEOC45 0.04 0.38 0.18 0.34 0.05 0.01
## PNEOC46 0.00 0.11 0.22 0.53 0.13 0.01
## PNEOC47 0.01 0.12 0.23 0.53 0.11 0.01
## PNEOC48 0.11 0.38 0.18 0.28 0.05 0.02
## PNEOC51 0.02 0.12 0.12 0.60 0.14 0.01
## PNEOC52 0.02 0.16 0.17 0.53 0.12 0.01
## PNEOC53 0.01 0.05 0.20 0.62 0.13 0.01
## PNEOC54 0.02 0.19 0.19 0.53 0.07 0.01
## PNEOC55 0.01 0.07 0.13 0.62 0.17 0.01
## PNEOC56 0.01 0.12 0.16 0.63 0.09 0.01
## PNEOC57 0.02 0.25 0.15 0.51 0.07 0.01
## PNEOC58 0.02 0.14 0.24 0.52 0.09 0.01
## PNEOC61 0.11 0.49 0.19 0.16 0.04 0.01
## PNEOC62 0.00 0.02 0.11 0.71 0.16 0.01
## PNEOC63 0.02 0.40 0.21 0.33 0.05 0.01
## PNEOC64 0.01 0.19 0.24 0.50 0.06 0.01
## PNEOC65 0.03 0.29 0.26 0.40 0.03 0.01
## PNEOC66 0.01 0.15 0.20 0.59 0.05 0.01
## PNEOC67 0.01 0.09 0.17 0.58 0.15 0.01
## PNEOC68 0.00 0.13 0.25 0.56 0.05 0.01

```

```

Aalpha <- subset(SPAN, select = c(PNEOA11, PNEOA12, PNEOA13, PNEOA14, PNEOA15,
  PNEOA16, PNEOA17, PNEOA18, PNEOA21, PNEOA22, PNEOA23, PNEOA24, PNEOA25,
  PNEOA26, PNEOA27, PNEOA28, PNEOA31, PNEOA32, PNEOA33, PNEOA34, PNEOA35,
  PNEOA36, PNEOA37, PNEOA38, PNEOA41, PNEOA42, PNEOA43, PNEOA44, PNEOA45,
  PNEOA46, PNEOA47, PNEOA48, PNEOA51, PNEOA52, PNEOA53, PNEOA54, PNEOA55,

```



```

PNEOA56, PNEOA57, PNEOA58, PNEOA61, PNEOA62, PNEOA63, PNEOA64, PNEOA65,
PNEOA66, PNEOA67, PNEOA68))
alpha(Aalpha)
##
## Reliability analysis
## Call: alpha(x = Aalpha)
##
##   raw_alpha std.alpha G6(smc) average_r S/N   ase mean   sd
##     0.86     0.87    0.89     0.12 6.5 0.0056 2.7 0.32
##
## lower alpha upper      95% confidence boundaries
## 0.85 0.86 0.87
##
## Reliability if an item is dropped:
##   raw_alpha std.alpha G6(smc) average_r S/N alpha se
## PNEOA11    0.86    0.86    0.89     0.12 6.3 0.0058
## PNEOA12    0.86    0.87    0.89     0.12 6.4 0.0057
## PNEOA13    0.86    0.86    0.89     0.12 6.4 0.0057
## PNEOA14    0.86    0.86    0.89     0.12 6.3 0.0057
## PNEOA15    0.86    0.86    0.89     0.12 6.3 0.0058
## PNEOA16    0.86    0.86    0.89     0.12 6.3 0.0058
## PNEOA17    0.86    0.86    0.89     0.12 6.2 0.0058
## PNEOA18    0.86    0.86    0.89     0.12 6.4 0.0057
## PNEOA21    0.86    0.86    0.89     0.12 6.4 0.0057
## PNEOA22    0.86    0.86    0.89     0.12 6.3 0.0058
## PNEOA23    0.86    0.87    0.89     0.12 6.5 0.0057
## PNEOA24    0.86    0.86    0.89     0.12 6.4 0.0057
## PNEOA25    0.86    0.87    0.89     0.12 6.4 0.0057
## PNEOA26    0.86    0.86    0.89     0.12 6.3 0.0058
## PNEOA27    0.86    0.86    0.89     0.12 6.3 0.0058
## PNEOA28    0.86    0.87    0.89     0.12 6.5 0.0057
## PNEOA31    0.86    0.86    0.89     0.12 6.3 0.0058
## PNEOA32    0.86    0.86    0.89     0.12 6.3 0.0057
## PNEOA33    0.86    0.86    0.89     0.12 6.2 0.0058
## PNEOA34    0.86    0.86    0.89     0.12 6.3 0.0057
## PNEOA35    0.86    0.87    0.89     0.12 6.4 0.0057
## PNEOA36    0.86    0.87    0.89     0.12 6.4 0.0057
## PNEOA37    0.86    0.86    0.89     0.12 6.4 0.0057
## PNEOA38    0.86    0.86    0.89     0.12 6.3 0.0057
## PNEOA41    0.86    0.87    0.89     0.12 6.5 0.0057
## PNEOA42    0.86    0.86    0.89     0.12 6.4 0.0057
## PNEOA43    0.86    0.87    0.89     0.12 6.6 0.0056
## PNEOA44    0.86    0.87    0.89     0.12 6.4 0.0057
## PNEOA45    0.86    0.87    0.89     0.12 6.4 0.0057
## PNEOA46    0.86    0.86    0.89     0.12 6.4 0.0057

```

```

## PNEQA47      0.86      0.86      0.89      0.12 6.4      0.0057
## PNEQA48      0.86      0.86      0.89      0.12 6.3      0.0057
## PNEQA51      0.86      0.86      0.89      0.12 6.4      0.0057
## PNEQA52      0.86      0.87      0.89      0.12 6.6      0.0056
## PNEQA53      0.86      0.86      0.89      0.12 6.4      0.0058
## PNEQA54      0.86      0.86      0.89      0.12 6.4      0.0057
## PNEQA55      0.86      0.87      0.89      0.12 6.6      0.0056
## PNEQA56      0.86      0.87      0.89      0.12 6.4      0.0057
## PNEQA57      0.86      0.87      0.89      0.12 6.4      0.0057
## PNEQA58      0.86      0.86      0.89      0.12 6.4      0.0057
## PNEQA61      0.86      0.87      0.89      0.12 6.5      0.0057
## PNEQA62      0.86      0.87      0.89      0.12 6.4      0.0057
## PNEQA63      0.86      0.87      0.89      0.12 6.5      0.0057
## PNEQA64      0.86      0.87      0.89      0.12 6.5      0.0057
## PNEQA65      0.86      0.87      0.89      0.12 6.5      0.0056
## PNEQA66      0.86      0.86      0.89      0.12 6.4      0.0057
## PNEQA67      0.86      0.86      0.89      0.12 6.4      0.0057
## PNEQA68      0.86      0.87      0.89      0.12 6.5      0.0057
##
## Item statistics
##          n raw.r std.r r.cor r.drop mean  sd
## PNEQA11 1609  0.49  0.48  0.47  0.44  2.5 0.96
## PNEQA12 1609  0.30  0.33  0.31  0.26  2.8 0.66
## PNEQA13 1609  0.40  0.39  0.38  0.34  2.4 1.05
## PNEQA14 1607  0.40  0.42  0.41  0.36  2.9 0.70
## PNEQA15 1606  0.42  0.43  0.42  0.38  2.8 0.79
## PNEQA16 1609  0.42  0.44  0.44  0.37  2.7 0.86
## PNEQA17 1607  0.49  0.52  0.52  0.46  2.9 0.67
## PNEQA18 1606  0.38  0.41  0.40  0.34  2.8 0.74
## PNEQA21 1605  0.40  0.39  0.36  0.35  2.9 0.99
## PNEQA22 1608  0.49  0.47  0.47  0.44  3.0 0.92
## PNEQA23 1609  0.33  0.31  0.28  0.27  2.1 1.02
## PNEQA24 1609  0.37  0.37  0.34  0.31  3.0 0.95
## PNEQA25 1608  0.30  0.32  0.29  0.26  3.2 0.75
## PNEQA26 1610  0.48  0.47  0.46  0.44  3.0 0.85
## PNEQA27 1608  0.50  0.49  0.49  0.46  3.0 0.90
## PNEQA28 1603  0.28  0.25  0.22  0.22  2.3 0.92
## PNEQA31 1605  0.52  0.51  0.50  0.47  3.0 0.95
## PNEQA32 1611  0.39  0.42  0.40  0.35  3.3 0.67
## PNEQA33 1609  0.55  0.55  0.55  0.51  3.1 0.86
## PNEQA34 1609  0.41  0.45  0.43  0.38  3.4 0.59
## PNEQA35 1608  0.33  0.34  0.32  0.27  2.8 0.88
## PNEQA36 1606  0.31  0.35  0.32  0.28  3.0 0.58
## PNEQA37 1607  0.37  0.41  0.39  0.34  2.9 0.65
## PNEQA38 1607  0.40  0.42  0.41  0.36  2.9 0.70

```

```

## PNEOA41 1612 0.30 0.29 0.26 0.24 2.7 0.92
## PNEOA42 1608 0.39 0.36 0.34 0.33 1.6 1.06
## PNEOA43 1607 0.19 0.17 0.13 0.12 2.0 1.03
## PNEOA44 1610 0.36 0.36 0.33 0.32 2.7 0.84
## PNEOA45 1606 0.33 0.32 0.30 0.27 2.4 0.89
## PNEOA46 1607 0.40 0.38 0.36 0.34 2.4 0.97
## PNEOA47 1608 0.39 0.37 0.36 0.33 2.4 1.03
## PNEOA48 1607 0.42 0.43 0.41 0.38 3.1 0.71
## PNEOA51 1609 0.41 0.39 0.37 0.35 2.6 0.94
## PNEOA52 1612 0.22 0.20 0.17 0.16 2.3 0.93
## PNEOA53 1607 0.44 0.41 0.40 0.38 2.7 0.91
## PNEOA54 1606 0.36 0.37 0.35 0.32 2.9 0.67
## PNEOA55 1607 0.25 0.22 0.19 0.18 1.8 0.97
## PNEOA56 1605 0.35 0.34 0.31 0.29 2.4 1.05
## PNEOA57 1608 0.32 0.33 0.30 0.27 2.6 0.76
## PNEOA58 1605 0.39 0.37 0.35 0.33 2.5 0.95
## PNEOA61 1609 0.26 0.27 0.24 0.21 3.2 0.79
## PNEOA62 1610 0.37 0.34 0.32 0.31 2.1 0.99
## PNEOA63 1607 0.31 0.31 0.28 0.25 2.7 0.98
## PNEOA64 1606 0.30 0.31 0.28 0.25 2.5 0.89
## PNEOA65 1604 0.24 0.25 0.22 0.19 2.5 0.87
## PNEOA66 1608 0.38 0.40 0.38 0.34 3.3 0.77
## PNEOA67 1610 0.38 0.40 0.38 0.34 3.1 0.69
## PNEOA68 1601 0.26 0.27 0.23 0.21 2.4 0.85
##
## Non missing response frequency for each item
##      0      1      2      3      4 miss
## PNEOA11 0.02 0.15 0.25 0.45 0.14 0.01
## PNEOA12 0.01 0.04 0.15 0.71 0.09 0.01
## PNEOA13 0.04 0.19 0.17 0.49 0.11 0.01
## PNEOA14 0.01 0.05 0.14 0.69 0.12 0.01
## PNEOA15 0.01 0.07 0.13 0.64 0.15 0.01
## PNEOA16 0.01 0.11 0.16 0.60 0.11 0.01
## PNEOA17 0.00 0.04 0.14 0.68 0.14 0.01
## PNEOA18 0.00 0.06 0.17 0.64 0.12 0.01
## PNEOA21 0.03 0.08 0.12 0.47 0.30 0.02
## PNEOA22 0.01 0.08 0.12 0.47 0.33 0.01
## PNEOA23 0.03 0.33 0.25 0.32 0.07 0.01
## PNEOA24 0.01 0.09 0.11 0.48 0.31 0.01
## PNEOA25 0.01 0.02 0.04 0.55 0.37 0.01
## PNEOA26 0.00 0.07 0.10 0.54 0.28 0.01
## PNEOA27 0.01 0.08 0.11 0.48 0.32 0.01
## PNEOA28 0.02 0.21 0.33 0.37 0.07 0.02
## PNEOA31 0.01 0.10 0.10 0.49 0.30 0.02
## PNEOA32 0.01 0.01 0.03 0.56 0.40 0.01

```

```

## PNEOA33 0.01 0.06 0.10 0.50 0.33 0.01
## PNEOA34 0.01 0.00 0.02 0.57 0.40 0.01
## PNEOA35 0.01 0.11 0.16 0.56 0.16 0.01
## PNEOA36 0.00 0.01 0.11 0.73 0.14 0.01
## PNEOA37 0.00 0.03 0.14 0.69 0.14 0.01
## PNEOA38 0.00 0.04 0.18 0.63 0.15 0.01
## PNEOA41 0.02 0.12 0.19 0.54 0.13 0.01
## PNEOA42 0.09 0.49 0.18 0.17 0.06 0.01
## PNEOA43 0.04 0.37 0.17 0.39 0.03 0.01
## PNEOA44 0.01 0.09 0.23 0.56 0.11 0.01
## PNEOA45 0.02 0.19 0.25 0.50 0.04 0.01
## PNEOA46 0.02 0.20 0.24 0.45 0.10 0.01
## PNEOA47 0.03 0.22 0.22 0.42 0.11 0.01
## PNEOA48 0.00 0.03 0.09 0.61 0.27 0.01
## PNEOA51 0.01 0.15 0.23 0.47 0.14 0.01
## PNEOA52 0.02 0.20 0.27 0.45 0.06 0.01
## PNEOA53 0.01 0.09 0.25 0.46 0.19 0.01
## PNEOA54 0.00 0.03 0.17 0.65 0.14 0.01
## PNEOA55 0.06 0.35 0.33 0.22 0.04 0.01
## PNEOA56 0.03 0.22 0.19 0.43 0.13 0.02
## PNEOA57 0.01 0.07 0.29 0.54 0.09 0.01
## PNEOA58 0.02 0.13 0.30 0.41 0.14 0.02
## PNEOA61 0.02 0.02 0.10 0.52 0.34 0.01
## PNEOA62 0.04 0.27 0.28 0.35 0.05 0.01
## PNEOA63 0.02 0.12 0.21 0.44 0.21 0.01
## PNEOA64 0.03 0.12 0.27 0.52 0.07 0.01
## PNEOA65 0.01 0.13 0.28 0.49 0.10 0.02
## PNEOA66 0.00 0.04 0.04 0.47 0.45 0.01
## PNEOA67 0.01 0.02 0.06 0.66 0.24 0.01
## PNEOA68 0.01 0.16 0.35 0.43 0.06 0.02

Ealpha <- subset(SPAN, select = c(PNEOE11, PNEOE12, PNEOE13, PNEOE14, PNEOE15,
  PNEOE16, PNEOE17, PNEOE18, PNEOE21, PNEOE22, PNEOE23, PNEOE24, PNEOE25,
  PNEOE26, PNEOE27, PNEOE28, PNEOE31, PNEOE32, PNEOE33, PNEOE34, PNEOE35,
  PNEOE36, PNEOE37, PNEOE38, PNEOE41, PNEOE42, PNEOE43, PNEOE44, PNEOE45,
  PNEOE46, PNEOE47, PNEOE48, PNEOE51, PNEOE52, PNEOE53, PNEOE54, PNEOE55,
  PNEOE56, PNEOE57, PNEOE58, PNEOE61, PNEOE62, PNEOE63, PNEOE64, PNEOE65,
  PNEOE66, PNEOE67, PNEOE68))
alpha(Ealpha, check.keys = FALSE)

##
## Reliability analysis
## Call: alpha(x = Ealpha, check.keys = FALSE)
##
##   raw_alpha std.alpha G6(smc) average_r S/N   ase mean   sd
##     0.88     0.89     0.91     0.14 8.1 0.0049 2.3 0.38

```

```

##
## lower alpha upper      95% confidence boundaries
## 0.87 0.88 0.89
##
## Reliability if an item is dropped:
##      raw_alpha std.alpha G6(smc) average_r S/N alpha se
## PNEOE11      0.88      0.89      0.91      0.15 8.0  0.0050
## PNEOE12      0.88      0.89      0.91      0.14 7.8  0.0051
## PNEOE13      0.88      0.89      0.91      0.14 7.8  0.0050
## PNEOE14      0.88      0.89      0.91      0.14 7.9  0.0050
## PNEOE15      0.88      0.88      0.91      0.14 7.7  0.0051
## PNEOE16      0.88      0.89      0.91      0.14 7.8  0.0051
## PNEOE17      0.88      0.89      0.91      0.14 7.9  0.0050
## PNEOE18      0.88      0.89      0.91      0.14 7.9  0.0050
## PNEOE21      0.88      0.89      0.91      0.14 7.7  0.0051
## PNEOE22      0.88      0.89      0.91      0.14 7.7  0.0051
## PNEOE23      0.88      0.89      0.91      0.14 7.8  0.0051
## PNEOE24      0.88      0.89      0.91      0.15 8.2  0.0049
## PNEOE25      0.88      0.89      0.91      0.14 7.9  0.0050
## PNEOE26      0.88      0.89      0.91      0.15 8.1  0.0049
## PNEOE27      0.88      0.89      0.91      0.14 7.7  0.0051
## PNEOE28      0.88      0.88      0.91      0.14 7.7  0.0051
## PNEOE31      0.88      0.89      0.91      0.15 8.0  0.0050
## PNEOE32      0.88      0.89      0.91      0.15 8.0  0.0050
## PNEOE33      0.88      0.89      0.91      0.14 7.8  0.0051
## PNEOE34      0.88      0.89      0.91      0.14 7.9  0.0050
## PNEOE35      0.88      0.89      0.91      0.14 7.9  0.0050
## PNEOE36      0.88      0.89      0.91      0.14 7.8  0.0051
## PNEOE37      0.88      0.89      0.91      0.15 8.0  0.0050
## PNEOE38      0.88      0.89      0.91      0.14 7.8  0.0050
## PNEOE41      0.89      0.89      0.91      0.15 8.4  0.0048
## PNEOE42      0.88      0.89      0.91      0.14 7.9  0.0050
## PNEOE43      0.88      0.89      0.91      0.15 8.0  0.0049
## PNEOE44      0.88      0.89      0.91      0.14 7.9  0.0050
## PNEOE45      0.88      0.89      0.91      0.14 7.8  0.0051
## PNEOE46      0.88      0.89      0.91      0.15 8.2  0.0049
## PNEOE47      0.88      0.89      0.91      0.14 7.9  0.0050
## PNEOE48      0.88      0.89      0.91      0.14 7.8  0.0051
## PNEOE51      0.88      0.89      0.91      0.15 8.0  0.0050
## PNEOE52      0.88      0.89      0.91      0.15 8.2  0.0048
## PNEOE53      0.88      0.89      0.91      0.15 8.2  0.0049
## PNEOE54      0.89      0.89      0.91      0.15 8.3  0.0048
## PNEOE55      0.88      0.89      0.91      0.14 7.8  0.0051
## PNEOE56      0.88      0.89      0.91      0.15 8.2  0.0048
## PNEOE57      0.88      0.89      0.91      0.15 8.0  0.0050

```

```

## PNEOE58      0.88      0.89      0.91      0.14 7.9      0.0050
## PNEOE61      0.88      0.89      0.91      0.14 7.9      0.0050
## PNEOE62      0.88      0.89      0.91      0.14 7.9      0.0050
## PNEOE63      0.88      0.89      0.91      0.14 7.8      0.0051
## PNEOE64      0.88      0.89      0.91      0.14 7.8      0.0051
## PNEOE65      0.88      0.89      0.91      0.14 7.9      0.0050
## PNEOE66      0.88      0.88      0.91      0.14 7.6      0.0051
## PNEOE67      0.88      0.89      0.91      0.14 7.8      0.0050
## PNEOE68      0.88      0.89      0.91      0.14 7.9      0.0050
##
## Item statistics
##           n raw.r std.r   r.cor r.drop mean  sd
## PNEOE11 1606 0.332 0.350  0.3226 0.295  2.8 0.72
## PNEOE12 1609 0.518 0.532  0.5273 0.482  2.9 0.89
## PNEOE13 1609 0.451 0.476  0.4666 0.420  3.1 0.72
## PNEOE14 1609 0.385 0.396  0.3782 0.342  3.0 0.89
## PNEOE15 1610 0.574 0.594  0.5954 0.544  2.9 0.80
## PNEOE16 1609 0.514 0.531  0.5220 0.477  2.7 0.91
## PNEOE17 1607 0.397 0.415  0.3950 0.357  2.8 0.83
## PNEOE18 1603 0.377 0.399  0.3766 0.341  2.8 0.75
## PNEOE21 1608 0.595 0.584  0.5805 0.551  2.3 1.18
## PNEOE22 1608 0.557 0.560  0.5564 0.523  1.6 0.88
## PNEOE23 1610 0.500 0.498  0.4923 0.458  2.0 0.98
## PNEOE24 1605 0.164 0.167  0.1314 0.109  1.8 1.03
## PNEOE25 1605 0.435 0.431  0.4195 0.385  2.1 1.10
## PNEOE26 1608 0.289 0.273  0.2439 0.229  2.1 1.16
## PNEOE27 1606 0.548 0.553  0.5483 0.514  2.7 0.86
## PNEOE28 1604 0.617 0.610  0.6130 0.582  2.1 1.01
## PNEOE31 1606 0.348 0.344  0.3207 0.297  1.7 1.05
## PNEOE32 1606 0.332 0.327  0.2997 0.284  1.6 0.97
## PNEOE33 1610 0.508 0.505  0.4972 0.463  2.3 1.07
## PNEOE34 1609 0.427 0.421  0.4026 0.380  2.0 0.98
## PNEOE35 1607 0.418 0.423  0.4048 0.380  2.5 0.83
## PNEOE36 1607 0.515 0.507  0.4976 0.473  2.0 1.01
## PNEOE37 1608 0.298 0.302  0.2728 0.255  1.6 0.84
## PNEOE38 1605 0.459 0.458  0.4446 0.419  2.7 0.89
## PNEOE41 1610 0.016 0.012 -0.0361 -0.040  1.7 1.01
## PNEOE42 1609 0.395 0.407  0.3869 0.358  2.5 0.80
## PNEOE43 1606 0.293 0.287  0.2559 0.239  2.1 1.05
## PNEOE44 1609 0.447 0.451  0.4361 0.406  1.9 0.93
## PNEOE45 1609 0.513 0.511  0.4993 0.470  2.3 1.01
## PNEOE46 1607 0.177 0.178  0.1437 0.125  1.8 0.97
## PNEOE47 1608 0.442 0.441  0.4281 0.396  1.7 1.01
## PNEOE48 1606 0.506 0.509  0.4983 0.467  2.5 0.92
## PNEOE51 1608 0.337 0.329  0.3068 0.292  1.7 0.91

```

```

## PNEOE52 1608 0.192 0.163 0.1259 0.122 2.2 1.30
## PNEOE53 1609 0.201 0.187 0.1528 0.145 2.0 1.06
## PNEOE54 1610 0.082 0.055 0.0089 0.012 1.8 1.26
## PNEOE55 1608 0.524 0.520 0.5108 0.487 2.1 0.88
## PNEOE56 1604 0.184 0.157 0.1180 0.114 1.5 1.29
## PNEOE57 1608 0.307 0.302 0.2715 0.258 1.7 0.97
## PNEOE58 1605 0.403 0.394 0.3719 0.355 2.1 1.02
## PNEOE61 1611 0.385 0.378 0.3571 0.330 2.6 1.10
## PNEOE62 1609 0.374 0.382 0.3629 0.331 2.8 0.90
## PNEOE63 1607 0.505 0.512 0.5032 0.462 2.6 1.00
## PNEOE64 1607 0.506 0.517 0.5119 0.467 2.5 0.91
## PNEOE65 1606 0.415 0.421 0.4029 0.369 2.2 0.96
## PNEOE66 1608 0.634 0.647 0.6522 0.605 2.6 0.86
## PNEOE67 1608 0.460 0.459 0.4401 0.411 1.9 1.09
## PNEOE68 1607 0.421 0.441 0.4229 0.384 3.0 0.78
##
## Non missing response frequency for each item
##      0      1      2      3      4 miss
## PNEOE11 0.01 0.04 0.22 0.62 0.11 0.01
## PNEOE12 0.01 0.08 0.14 0.55 0.22 0.01
## PNEOE13 0.00 0.03 0.12 0.58 0.27 0.01
## PNEOE14 0.01 0.08 0.12 0.51 0.28 0.01
## PNEOE15 0.01 0.04 0.18 0.55 0.23 0.01
## PNEOE16 0.01 0.11 0.16 0.55 0.17 0.01
## PNEOE17 0.01 0.08 0.20 0.55 0.16 0.01
## PNEOE18 0.00 0.07 0.20 0.62 0.10 0.02
## PNEOE21 0.06 0.27 0.18 0.34 0.15 0.01
## PNEOE22 0.07 0.41 0.36 0.15 0.02 0.01
## PNEOE23 0.04 0.31 0.29 0.32 0.04 0.01
## PNEOE24 0.08 0.41 0.21 0.26 0.03 0.02
## PNEOE25 0.06 0.29 0.21 0.37 0.08 0.02
## PNEOE26 0.08 0.29 0.22 0.30 0.11 0.01
## PNEOE27 0.01 0.11 0.17 0.59 0.12 0.01
## PNEOE28 0.05 0.26 0.26 0.38 0.04 0.02
## PNEOE31 0.11 0.36 0.25 0.24 0.04 0.01
## PNEOE32 0.04 0.56 0.17 0.19 0.04 0.01
## PNEOE33 0.04 0.23 0.18 0.44 0.11 0.01
## PNEOE34 0.04 0.31 0.26 0.35 0.03 0.01
## PNEOE35 0.01 0.13 0.27 0.52 0.07 0.01
## PNEOE36 0.05 0.32 0.25 0.34 0.05 0.01
## PNEOE37 0.05 0.50 0.29 0.15 0.01 0.01
## PNEOE38 0.01 0.13 0.15 0.59 0.12 0.02
## PNEOE41 0.06 0.48 0.17 0.26 0.03 0.01
## PNEOE42 0.00 0.11 0.34 0.47 0.08 0.01
## PNEOE43 0.03 0.33 0.18 0.39 0.06 0.01

```

```

## PNEOE44 0.04 0.35 0.32 0.26 0.03 0.01
## PNEOE45 0.02 0.28 0.18 0.45 0.07 0.01
## PNEOE46 0.04 0.47 0.19 0.27 0.02 0.01
## PNEOE47 0.08 0.45 0.22 0.23 0.03 0.01
## PNEOE48 0.01 0.15 0.26 0.47 0.11 0.01
## PNEOE51 0.07 0.42 0.33 0.17 0.02 0.01
## PNEOE52 0.13 0.21 0.15 0.34 0.16 0.01
## PNEOE53 0.08 0.28 0.18 0.44 0.02 0.01
## PNEOE54 0.15 0.34 0.11 0.31 0.09 0.01
## PNEOE55 0.02 0.25 0.37 0.33 0.03 0.01
## PNEOE56 0.30 0.29 0.13 0.22 0.06 0.02
## PNEOE57 0.07 0.43 0.28 0.19 0.03 0.01
## PNEOE58 0.06 0.22 0.26 0.41 0.04 0.02
## PNEOE61 0.05 0.15 0.10 0.51 0.20 0.01
## PNEOE62 0.01 0.09 0.19 0.52 0.19 0.01
## PNEOE63 0.02 0.15 0.19 0.47 0.16 0.01
## PNEOE64 0.02 0.15 0.25 0.49 0.08 0.01
## PNEOE65 0.02 0.27 0.26 0.40 0.06 0.01
## PNEOE66 0.01 0.09 0.28 0.49 0.13 0.01
## PNEOE67 0.05 0.42 0.13 0.34 0.06 0.01
## PNEOE68 0.00 0.06 0.10 0.60 0.24 0.01

Oalpha <- subset(SPAN, select = c(PNEO011, PNEO012, PNEO013, PNEO014, PNEO015,
  PNEO016, PNEO017, PNEO018, PNEO021, PNEO022, PNEO023, PNEO024, PNEO025,
  PNEO026, PNEO027, PNEO028, PNEO031, PNEO032, PNEO033, PNEO034, PNEO035,
  PNEO036, PNEO037, PNEO038, PNEO041, PNEO042, PNEO043, PNEO044, PNEO045,
  PNEO046, PNEO047, PNEO048, PNEO051, PNEO052, PNEO053, PNEO054, PNEO055,
  PNEO056, PNEO057, PNEO058, PNEO061, PNEO062, PNEO063, PNEO064, PNEO065,
  PNEO066, PNEO067, PNEO068))
alpha(Oalpha)

##
## Reliability analysis
## Call: alpha(x = Oalpha)
##
##   raw_alpha std.alpha G6(smc) average_r S/N   ase mean  sd
##     0.88     0.88    0.91     0.14 7.7 0.0048 2.3 0.38
##
##   lower alpha upper      95% confidence boundaries
## 0.88 0.88 0.89
##
## Reliability if an item is dropped:
##   raw_alpha std.alpha G6(smc) average_r S/N alpha se
## PNEO011     0.88     0.88    0.90     0.14 7.5 0.0049
## PNEO012     0.88     0.88    0.90     0.14 7.5 0.0049
## PNEO013     0.88     0.88    0.90     0.14 7.5 0.0049

```



|            |      |      |      |      |     |        |
|------------|------|------|------|------|-----|--------|
| ## PNE0014 | 0.88 | 0.88 | 0.90 | 0.14 | 7.5 | 0.0049 |
| ## PNE0015 | 0.88 | 0.88 | 0.90 | 0.14 | 7.5 | 0.0049 |
| ## PNE0016 | 0.88 | 0.88 | 0.91 | 0.14 | 7.6 | 0.0048 |
| ## PNE0017 | 0.88 | 0.88 | 0.91 | 0.14 | 7.6 | 0.0049 |
| ## PNE0018 | 0.88 | 0.88 | 0.90 | 0.14 | 7.5 | 0.0049 |
| ## PNE0021 | 0.88 | 0.88 | 0.90 | 0.14 | 7.4 | 0.0050 |
| ## PNE0022 | 0.88 | 0.88 | 0.91 | 0.14 | 7.6 | 0.0048 |
| ## PNE0023 | 0.88 | 0.88 | 0.90 | 0.14 | 7.5 | 0.0049 |
| ## PNE0024 | 0.88 | 0.88 | 0.90 | 0.13 | 7.3 | 0.0050 |
| ## PNE0025 | 0.88 | 0.88 | 0.90 | 0.14 | 7.4 | 0.0050 |
| ## PNE0026 | 0.88 | 0.88 | 0.90 | 0.14 | 7.5 | 0.0049 |
| ## PNE0027 | 0.88 | 0.88 | 0.90 | 0.13 | 7.3 | 0.0050 |
| ## PNE0028 | 0.88 | 0.88 | 0.90 | 0.14 | 7.5 | 0.0049 |
| ## PNE0031 | 0.88 | 0.88 | 0.91 | 0.14 | 7.7 | 0.0048 |
| ## PNE0032 | 0.88 | 0.88 | 0.90 | 0.14 | 7.6 | 0.0049 |
| ## PNE0033 | 0.88 | 0.89 | 0.91 | 0.14 | 7.7 | 0.0048 |
| ## PNE0034 | 0.88 | 0.88 | 0.91 | 0.14 | 7.5 | 0.0049 |
| ## PNE0035 | 0.88 | 0.88 | 0.91 | 0.14 | 7.5 | 0.0049 |
| ## PNE0036 | 0.88 | 0.88 | 0.90 | 0.14 | 7.4 | 0.0049 |
| ## PNE0037 | 0.88 | 0.88 | 0.91 | 0.14 | 7.6 | 0.0049 |
| ## PNE0038 | 0.88 | 0.88 | 0.90 | 0.14 | 7.5 | 0.0049 |
| ## PNE0041 | 0.88 | 0.88 | 0.91 | 0.14 | 7.6 | 0.0048 |
| ## PNE0042 | 0.88 | 0.88 | 0.90 | 0.14 | 7.5 | 0.0049 |
| ## PNE0043 | 0.88 | 0.88 | 0.91 | 0.14 | 7.7 | 0.0048 |
| ## PNE0044 | 0.88 | 0.88 | 0.90 | 0.14 | 7.4 | 0.0049 |
| ## PNE0045 | 0.88 | 0.88 | 0.90 | 0.14 | 7.5 | 0.0049 |
| ## PNE0046 | 0.89 | 0.89 | 0.91 | 0.14 | 7.7 | 0.0048 |
| ## PNE0047 | 0.88 | 0.88 | 0.91 | 0.14 | 7.6 | 0.0048 |
| ## PNE0048 | 0.89 | 0.88 | 0.91 | 0.14 | 7.7 | 0.0048 |
| ## PNE0051 | 0.88 | 0.88 | 0.90 | 0.14 | 7.3 | 0.0050 |
| ## PNE0052 | 0.88 | 0.88 | 0.90 | 0.14 | 7.3 | 0.0050 |
| ## PNE0053 | 0.88 | 0.88 | 0.91 | 0.14 | 7.7 | 0.0048 |
| ## PNE0054 | 0.88 | 0.88 | 0.90 | 0.14 | 7.4 | 0.0050 |
| ## PNE0055 | 0.88 | 0.88 | 0.90 | 0.14 | 7.6 | 0.0048 |
| ## PNE0056 | 0.88 | 0.88 | 0.90 | 0.14 | 7.3 | 0.0050 |
| ## PNE0057 | 0.88 | 0.88 | 0.90 | 0.13 | 7.3 | 0.0050 |
| ## PNE0058 | 0.88 | 0.88 | 0.90 | 0.13 | 7.3 | 0.0050 |
| ## PNE0061 | 0.88 | 0.88 | 0.90 | 0.14 | 7.5 | 0.0049 |
| ## PNE0062 | 0.88 | 0.88 | 0.91 | 0.14 | 7.6 | 0.0049 |
| ## PNE0063 | 0.88 | 0.88 | 0.91 | 0.14 | 7.6 | 0.0048 |
| ## PNE0064 | 0.88 | 0.88 | 0.91 | 0.14 | 7.6 | 0.0049 |
| ## PNE0065 | 0.88 | 0.88 | 0.90 | 0.14 | 7.5 | 0.0049 |
| ## PNE0066 | 0.88 | 0.88 | 0.90 | 0.14 | 7.5 | 0.0049 |
| ## PNE0067 | 0.88 | 0.88 | 0.91 | 0.14 | 7.6 | 0.0048 |
| ## PNE0068 | 0.88 | 0.88 | 0.91 | 0.14 | 7.6 | 0.0048 |

```

##
## Item statistics
##          n raw.r std.r r.cor r.drop mean  sd
## PNE0011 1607  0.42  0.42  0.40  0.37  2.5 0.96
## PNE0012 1611  0.44  0.43  0.41  0.39  1.8 1.01
## PNE0013 1608  0.39  0.38  0.36  0.34  1.8 0.99
## PNE0014 1607  0.42  0.42  0.40  0.37  1.9 0.98
## PNE0015 1606  0.42  0.42  0.41  0.38  1.7 0.99
## PNE0016 1608  0.28  0.28  0.26  0.24  1.8 0.85
## PNE0017 1607  0.36  0.36  0.33  0.31  2.7 0.99
## PNE0018 1605  0.44  0.44  0.42  0.40  2.2 1.01
## PNE0021 1600  0.51  0.51  0.49  0.47  2.5 1.06
## PNE0022 1608  0.34  0.32  0.30  0.28  2.3 1.11
## PNE0023 1610  0.42  0.41  0.39  0.37  2.2 1.17
## PNE0024 1606  0.57  0.57  0.56  0.54  2.8 0.91
## PNE0025 1609  0.54  0.53  0.53  0.49  2.4 1.08
## PNE0026 1610  0.37  0.36  0.35  0.32  2.5 0.98
## PNE0027 1607  0.60  0.59  0.59  0.56  2.2 1.07
## PNE0028 1604  0.38  0.37  0.35  0.33  1.8 0.93
## PNE0031 1605  0.26  0.25  0.23  0.20  2.0 0.98
## PNE0032 1608  0.36  0.36  0.34  0.31  2.6 0.96
## PNE0033 1610  0.21  0.23  0.20  0.18  3.1 0.62
## PNE0034 1607  0.37  0.38  0.36  0.33  2.5 0.88
## PNE0035 1608  0.36  0.36  0.34  0.31  2.4 0.94
## PNE0036 1603  0.45  0.46  0.44  0.41  2.7 0.88
## PNE0037 1608  0.34  0.36  0.33  0.30  2.7 0.81
## PNE0038 1607  0.43  0.42  0.40  0.38  1.9 1.06
## PNE0041 1610  0.29  0.29  0.26  0.24  1.5 0.91
## PNE0042 1611  0.40  0.42  0.40  0.37  3.0 0.72
## PNE0043 1606  0.23  0.24  0.21  0.20  1.1 0.70
## PNE0044 1608  0.48  0.47  0.46  0.43  2.3 1.15
## PNE0045 1608  0.39  0.39  0.37  0.34  1.7 0.90
## PNE0046 1607  0.21  0.21  0.17  0.15  2.3 1.04
## PNE0047 1610  0.30  0.29  0.27  0.25  2.2 0.97
## PNE0048 1606  0.25  0.25  0.21  0.20  2.0 1.02
## PNE0051 1608  0.56  0.55  0.55  0.52  2.1 1.06
## PNE0052 1608  0.55  0.55  0.54  0.51  2.6 1.00
## PNE0053 1610  0.26  0.26  0.24  0.21  2.7 0.96
## PNE0054 1608  0.52  0.51  0.51  0.47  2.1 1.07
## PNE0055 1607  0.31  0.30  0.29  0.26  2.1 1.09
## PNE0056 1606  0.55  0.54  0.54  0.51  2.7 1.06
## PNE0057 1606  0.57  0.58  0.58  0.54  2.8 0.84
## PNE0058 1604  0.59  0.59  0.59  0.56  2.7 0.87
## PNE0061 1608  0.40  0.42  0.40  0.36  3.2 0.80
## PNE0062 1606  0.35  0.36  0.34  0.31  2.9 0.90

```

```

## PNE0063 1603 0.35 0.34 0.32 0.29 2.4 1.13
## PNE0064 1607 0.34 0.35 0.32 0.30 2.7 0.85
## PNE0065 1606 0.38 0.38 0.36 0.33 2.3 0.98
## PNE0066 1607 0.39 0.40 0.38 0.35 3.0 0.73
## PNE0067 1610 0.30 0.31 0.28 0.26 2.9 0.83
## PNE0068 1599 0.31 0.31 0.28 0.26 1.9 1.02
##
## Non missing response frequency for each item
##      0      1      2      3      4 miss
## PNE0011 0.02 0.13 0.32 0.39 0.13 0.01
## PNE0012 0.06 0.44 0.20 0.26 0.03 0.01
## PNE0013 0.08 0.36 0.32 0.21 0.03 0.01
## PNE0014 0.05 0.37 0.28 0.26 0.04 0.01
## PNE0015 0.09 0.39 0.29 0.20 0.03 0.01
## PNE0016 0.02 0.40 0.35 0.21 0.01 0.01
## PNE0017 0.03 0.13 0.14 0.53 0.17 0.01
## PNE0018 0.03 0.28 0.20 0.42 0.06 0.02
## PNE0021 0.02 0.17 0.25 0.36 0.19 0.02
## PNE0022 0.05 0.22 0.20 0.39 0.14 0.01
## PNE0023 0.08 0.23 0.20 0.37 0.12 0.01
## PNE0024 0.01 0.08 0.19 0.50 0.21 0.01
## PNE0025 0.05 0.20 0.20 0.43 0.11 0.01
## PNE0026 0.02 0.16 0.22 0.46 0.14 0.01
## PNE0027 0.06 0.24 0.23 0.39 0.09 0.01
## PNE0028 0.06 0.32 0.36 0.23 0.02 0.02
## PNE0031 0.05 0.32 0.29 0.30 0.04 0.02
## PNE0032 0.01 0.18 0.18 0.50 0.13 0.01
## PNE0033 0.01 0.01 0.08 0.67 0.24 0.01
## PNE0034 0.01 0.17 0.21 0.54 0.06 0.01
## PNE0035 0.02 0.18 0.22 0.50 0.08 0.01
## PNE0036 0.01 0.13 0.15 0.59 0.12 0.02
## PNE0037 0.01 0.09 0.21 0.59 0.11 0.01
## PNE0038 0.07 0.35 0.23 0.30 0.05 0.01
## PNE0041 0.08 0.52 0.23 0.16 0.02 0.01
## PNE0042 0.01 0.03 0.15 0.61 0.21 0.01
## PNE0043 0.13 0.70 0.12 0.05 0.00 0.01
## PNE0044 0.06 0.24 0.19 0.37 0.14 0.01
## PNE0045 0.04 0.50 0.24 0.22 0.01 0.01
## PNE0046 0.03 0.27 0.14 0.49 0.06 0.01
## PNE0047 0.02 0.26 0.23 0.43 0.05 0.01
## PNE0048 0.03 0.41 0.16 0.36 0.03 0.01
## PNE0051 0.06 0.25 0.27 0.35 0.08 0.01
## PNE0052 0.03 0.14 0.24 0.43 0.16 0.01
## PNE0053 0.03 0.10 0.16 0.53 0.18 0.01
## PNE0054 0.04 0.34 0.21 0.33 0.08 0.01

```

```

## PNEO055 0.07 0.28 0.22 0.36 0.07 0.01
## PNEO056 0.04 0.14 0.16 0.46 0.21 0.01
## PNEO057 0.00 0.08 0.19 0.55 0.18 0.01
## PNEO058 0.01 0.11 0.19 0.55 0.15 0.02
## PNEO061 0.01 0.03 0.08 0.48 0.40 0.01
## PNEO062 0.02 0.08 0.14 0.54 0.23 0.01
## PNEO063 0.05 0.18 0.27 0.31 0.19 0.02
## PNEO064 0.02 0.09 0.21 0.57 0.11 0.01
## PNEO065 0.03 0.20 0.26 0.43 0.07 0.01
## PNEO066 0.01 0.03 0.10 0.63 0.22 0.01
## PNEO067 0.01 0.07 0.11 0.59 0.21 0.01
## PNEO068 0.08 0.30 0.32 0.25 0.05 0.02

Nalpha <- subset(SPAN, select = c(PNEON11, PNEON12, PNEON13, PNEON14, PNEON15,
  PNEON16, PNEON17, PNEON18, PNEON21, PNEON22, PNEON23, PNEON24, PNEON25,
  PNEON26, PNEON27, PNEON28, PNEON31, PNEON32, PNEON33, PNEON34, PNEON35,
  PNEON36, PNEON37, PNEON38, PNEON41, PNEON42, PNEON43, PNEON44, PNEON45,
  PNEON46, PNEON47, PNEON48, PNEON51, PNEON52, PNEON53, PNEON54, PNEON55,
  PNEON56, PNEON57, PNEON58, PNEON61, PNEON62, PNEON63, PNEON64, PNEON65,
  PNEON66, PNEON67, PNEON68))
alpha(Nalpha, check.keys = FALSE)

##
## Reliability analysis
## Call: alpha(x = Nalpha, check.keys = FALSE)
##
##   raw_alpha std.alpha G6(smc) average_r S/N   ase mean  sd
##     0.92     0.92    0.93      0.2  12 0.0035  1.5 0.43
##
##   lower alpha upper      95% confidence boundaries
## 0.91 0.92 0.93
##
## Reliability if an item is dropped:
##   raw_alpha std.alpha G6(smc) average_r S/N alpha se
## PNEON11     0.92     0.92    0.93      0.20 12  0.0035
## PNEON12     0.92     0.92    0.93      0.20 12  0.0036
## PNEON13     0.92     0.92    0.93      0.20 11  0.0036
## PNEON14     0.92     0.92    0.93      0.20 11  0.0037
## PNEON15     0.92     0.92    0.93      0.20 12  0.0036
## PNEON16     0.92     0.92    0.93      0.20 12  0.0036
## PNEON17     0.92     0.92    0.93      0.20 12  0.0036
## PNEON18     0.92     0.92    0.93      0.20 12  0.0036
## PNEON21     0.92     0.92    0.93      0.20 12  0.0036
## PNEON22     0.92     0.92    0.93      0.20 12  0.0036
## PNEON23     0.92     0.92    0.93      0.20 12  0.0036
## PNEON24     0.92     0.92    0.93      0.20 12  0.0036

```

```

## PNEON25      0.92      0.92      0.93      0.20 12 0.0036
## PNEON26      0.92      0.92      0.93      0.20 12 0.0036
## PNEON27      0.92      0.92      0.93      0.20 12 0.0036
## PNEON28      0.92      0.92      0.93      0.20 12 0.0036
## PNEON31      0.92      0.92      0.93      0.20 12 0.0036
## PNEON32      0.92      0.92      0.93      0.20 11 0.0037
## PNEON33      0.92      0.92      0.93      0.20 11 0.0037
## PNEON34      0.92      0.92      0.93      0.20 12 0.0036
## PNEON35      0.92      0.92      0.93      0.20 12 0.0036
## PNEON36      0.92      0.92      0.93      0.20 11 0.0036
## PNEON37      0.92      0.92      0.93      0.20 11 0.0037
## PNEON38      0.92      0.92      0.93      0.19 11 0.0037
## PNEON41      0.92      0.92      0.93      0.20 12 0.0036
## PNEON42      0.92      0.92      0.93      0.20 12 0.0036
## PNEON43      0.92      0.92      0.93      0.20 12 0.0036
## PNEON44      0.92      0.92      0.93      0.20 12 0.0035
## PNEON45      0.92      0.92      0.93      0.20 11 0.0037
## PNEON46      0.92      0.92      0.93      0.20 12 0.0036
## PNEON47      0.92      0.92      0.93      0.20 12 0.0036
## PNEON48      0.92      0.92      0.94      0.21 12 0.0035
## PNEON51      0.92      0.92      0.93      0.20 12 0.0036
## PNEON52      0.92      0.92      0.93      0.20 12 0.0036
## PNEON53      0.92      0.92      0.94      0.21 12 0.0035
## PNEON54      0.92      0.92      0.93      0.20 12 0.0035
## PNEON55      0.92      0.92      0.93      0.20 12 0.0035
## PNEON56      0.92      0.92      0.93      0.20 12 0.0036
## PNEON57      0.92      0.92      0.93      0.20 12 0.0036
## PNEON58      0.92      0.92      0.93      0.20 12 0.0036
## PNEON61      0.92      0.92      0.93      0.20 12 0.0036
## PNEON62      0.92      0.92      0.93      0.20 12 0.0036
## PNEON63      0.92      0.92      0.93      0.20 11 0.0037
## PNEON64      0.92      0.92      0.93      0.20 12 0.0036
## PNEON65      0.92      0.92      0.93      0.20 12 0.0036
## PNEON66      0.92      0.92      0.93      0.20 12 0.0036
## PNEON67      0.92      0.92      0.93      0.20 12 0.0036
## PNEON68      0.92      0.92      0.93      0.20 11 0.0036
##
## Item statistics
##           n raw.r std.r r.cor r.drop mean  sd
## PNEON11 1606 0.35 0.34 0.32 0.30 1.90 1.14
## PNEON12 1611 0.52 0.53 0.51 0.49 1.14 0.81
## PNEON13 1609 0.58 0.58 0.58 0.55 1.58 0.97
## PNEON14 1608 0.64 0.64 0.64 0.62 1.12 0.88
## PNEON15 1608 0.45 0.44 0.42 0.41 1.93 0.98
## PNEON16 1610 0.55 0.54 0.53 0.52 1.91 1.02

```

```

## PNEON17 1608 0.46 0.46 0.45 0.42 1.71 0.84
## PNEON18 1609 0.50 0.49 0.47 0.45 1.58 1.09
## PNEON21 1606 0.53 0.53 0.52 0.50 1.10 0.88
## PNEON22 1609 0.44 0.44 0.43 0.40 1.19 0.84
## PNEON23 1609 0.34 0.34 0.32 0.30 0.95 0.93
## PNEON24 1607 0.38 0.38 0.36 0.34 1.30 0.92
## PNEON25 1605 0.44 0.45 0.43 0.41 1.34 0.86
## PNEON26 1610 0.46 0.47 0.45 0.43 1.32 0.93
## PNEON27 1605 0.53 0.52 0.50 0.49 2.02 1.02
## PNEON28 1602 0.53 0.53 0.51 0.49 1.70 0.94
## PNEON31 1610 0.54 0.53 0.52 0.50 1.41 1.04
## PNEON32 1606 0.65 0.65 0.65 0.62 1.03 1.01
## PNEON33 1609 0.61 0.61 0.60 0.58 1.51 1.02
## PNEON34 1607 0.51 0.50 0.49 0.47 1.75 1.13
## PNEON35 1606 0.45 0.45 0.43 0.41 1.81 0.97
## PNEON36 1607 0.61 0.61 0.61 0.58 1.00 0.90
## PNEON37 1605 0.63 0.62 0.62 0.60 1.48 1.01
## PNEON38 1606 0.65 0.66 0.66 0.63 1.22 0.83
## PNEON41 1611 0.44 0.43 0.41 0.40 1.66 0.99
## PNEON42 1609 0.40 0.39 0.37 0.35 1.76 1.04
## PNEON43 1607 0.58 0.57 0.57 0.55 1.34 1.06
## PNEON44 1606 0.31 0.30 0.27 0.26 2.08 1.05
## PNEON45 1610 0.61 0.61 0.61 0.58 1.19 0.94
## PNEON46 1607 0.47 0.48 0.47 0.44 1.12 0.77
## PNEON47 1604 0.36 0.36 0.33 0.32 1.70 0.94
## PNEON48 1606 0.16 0.15 0.12 0.12 2.32 0.88
## PNEON51 1610 0.34 0.33 0.30 0.29 1.73 1.02
## PNEON52 1607 0.44 0.44 0.42 0.40 1.98 1.02
## PNEON53 1609 0.16 0.15 0.12 0.11 2.10 1.00
## PNEON54 1612 0.32 0.32 0.29 0.28 2.46 1.01
## PNEON55 1608 0.25 0.25 0.22 0.21 1.98 0.88
## PNEON56 1605 0.41 0.40 0.39 0.37 0.89 0.94
## PNEON57 1608 0.43 0.42 0.40 0.39 1.94 0.98
## PNEON58 1604 0.36 0.36 0.34 0.32 2.01 0.94
## PNEON61 1610 0.51 0.52 0.50 0.48 0.82 0.79
## PNEON62 1613 0.41 0.42 0.40 0.38 0.88 0.68
## PNEON63 1607 0.61 0.60 0.59 0.57 1.54 1.04
## PNEON64 1607 0.39 0.41 0.40 0.36 1.11 0.80
## PNEON65 1606 0.52 0.52 0.51 0.48 1.45 0.94
## PNEON66 1608 0.41 0.44 0.43 0.39 0.96 0.67
## PNEON67 1607 0.45 0.47 0.46 0.43 1.20 0.61
## PNEON68 1608 0.61 0.62 0.62 0.58 1.05 0.73
##
## Non missing response frequency for each item
##          0      1      2      3      4 miss

```

```
## PNEON11 0.10 0.33 0.21 0.28 0.07 0.01
## PNEON12 0.17 0.61 0.14 0.07 0.01 0.01
## PNEON13 0.08 0.51 0.19 0.20 0.02 0.01
## PNEON14 0.22 0.56 0.13 0.09 0.01 0.01
## PNEON15 0.03 0.38 0.24 0.31 0.03 0.01
## PNEON16 0.06 0.37 0.22 0.32 0.03 0.01
## PNEON17 0.05 0.38 0.41 0.15 0.02 0.01
## PNEON18 0.17 0.37 0.18 0.27 0.01 0.01
## PNEON21 0.23 0.52 0.16 0.07 0.01 0.01
## PNEON22 0.16 0.60 0.15 0.08 0.01 0.01
## PNEON23 0.34 0.47 0.10 0.07 0.02 0.01
## PNEON24 0.14 0.59 0.13 0.13 0.02 0.01
## PNEON25 0.11 0.56 0.20 0.11 0.01 0.02
## PNEON26 0.14 0.55 0.16 0.13 0.02 0.01
## PNEON27 0.06 0.31 0.21 0.40 0.02 0.02
## PNEON28 0.05 0.47 0.22 0.25 0.01 0.02
## PNEON31 0.16 0.50 0.14 0.17 0.03 0.01
## PNEON32 0.34 0.43 0.11 0.11 0.01 0.01
## PNEON33 0.11 0.51 0.18 0.16 0.04 0.01
## PNEON34 0.13 0.36 0.18 0.29 0.04 0.01
## PNEON35 0.05 0.41 0.25 0.26 0.03 0.01
## PNEON36 0.30 0.50 0.12 0.07 0.01 0.01
## PNEON37 0.14 0.47 0.18 0.19 0.02 0.02
## PNEON38 0.14 0.60 0.15 0.10 0.01 0.01
## PNEON41 0.08 0.46 0.21 0.23 0.02 0.01
## PNEON42 0.07 0.43 0.20 0.26 0.04 0.01
## PNEON43 0.21 0.45 0.14 0.17 0.02 0.01
## PNEON44 0.03 0.36 0.21 0.33 0.08 0.01
## PNEON45 0.21 0.52 0.16 0.10 0.02 0.01
## PNEON46 0.15 0.65 0.12 0.07 0.00 0.01
## PNEON47 0.05 0.48 0.22 0.24 0.02 0.02
## PNEON48 0.01 0.21 0.25 0.50 0.03 0.01
## PNEON51 0.06 0.48 0.17 0.26 0.03 0.01
## PNEON52 0.05 0.34 0.24 0.33 0.04 0.01
## PNEON53 0.03 0.32 0.23 0.37 0.05 0.01
## PNEON54 0.02 0.22 0.14 0.52 0.10 0.01
## PNEON55 0.02 0.34 0.31 0.33 0.01 0.01
## PNEON56 0.39 0.45 0.07 0.09 0.01 0.02
## PNEON57 0.04 0.37 0.21 0.36 0.02 0.01
## PNEON58 0.03 0.34 0.24 0.37 0.02 0.02
## PNEON61 0.36 0.52 0.08 0.03 0.01 0.01
## PNEON62 0.25 0.67 0.05 0.02 0.01 0.01
## PNEON63 0.13 0.46 0.17 0.22 0.02 0.01
## PNEON64 0.19 0.58 0.16 0.06 0.01 0.01
## PNEON65 0.10 0.56 0.16 0.17 0.02 0.01
```

```

## PNEON66 0.20 0.68 0.09 0.03 0.00 0.01
## PNEON67 0.06 0.72 0.18 0.04 0.00 0.01
## PNEON68 0.17 0.66 0.11 0.04 0.01 0.01

# work variable retired, working, NE combining retired and working variables
# #retired people who work go with working
retworkne <- ifelse(SPAN$Pret == 1 & SPAN$work1 == 1, 1, ifelse(SPAN$Pret ==
  1 & SPAN$work1 == 2, 2, ifelse(SPAN$Pret == 1 & SPAN$work1 == 3, 2, ifelse(SPAN$Pret ==
  0 & SPAN$work1 == 1, 3, ifelse(SPAN$Pret == 0 & SPAN$work1 == 2, 2, ifelse(SPAN$Pret ==
  0 & SPAN$work1 == 3, 2, NA))))))
retworkne <- recode(retworkne, "1='retired'; 2='working'; 3='NE'") #labels
SPAN$retworkne <- retworkne
SPAN$retworkne <- as.factor(SPAN$retworkne)
mat <- matrix(c(0, 0, 1, 1, 0, 0), ncol = 2) #retired compared to Not employed (unemployed)
contrasts(SPAN$retworkne) <- mat
contrasts(SPAN$retworkne)

##          [,1] [,2]
## NE          0    1
## retired     0    0
## working     1    0

# DEMOGRAPHIC REGRESSIONS work groups: retworkne (retired, working, not
# employed)
summary(glm(formula = PVol ~ retworkne, family = "binomial", data = SPAN))

##
## Call:
## glm(formula = PVol ~ retworkne, family = "binomial", data = SPAN)
##
## Deviance Residuals:
##      Min       1Q   Median       3Q      Max
## -1.0553  -1.0553  -0.8495   1.3046   1.5455
##
## Coefficients:
##              Estimate Std. Error z value Pr(>|z|)
## (Intercept) -0.38137    0.10964  -3.478 0.000504 ***
## retworkne1   0.08717    0.12715   0.686 0.492949
## retworkne2  -0.45214    0.17797  -2.541 0.011067 *
## ---
## Signif. codes:  0 '***' 0.001 '**' 0.01 '*' 0.05 '.' 0.1 ' ' 1
##
## (Dispersion parameter for binomial family taken to be 1)
##
##      Null deviance: 2120.1  on 1571  degrees of freedom
## Residual deviance: 2107.3  on 1569  degrees of freedom

```



```

## (58 observations deleted due to missingness)
## AIC: 2113.3
##
## Number of Fisher Scoring iterations: 4

confint(glm(PV01 ~ GENDER, data = SPAN, family = "binomial"))

## Waiting for profiling to be done...

##           2.5 %      97.5 %
## (Intercept) -0.7308947 -0.4299659
## GENDER2      0.0840615  0.4856619

# gender
summary(glm(PV01 ~ GENDER, data = SPAN, family = "binomial"))

##
## Call:
## glm(formula = PV01 ~ GENDER, family = "binomial", data = SPAN)
##
## Deviance Residuals:
##      Min       1Q   Median       3Q      Max
## -1.0550  -1.0550  -0.9432   1.3049   1.4312
##
## Coefficients:
##              Estimate Std. Error z value Pr(>|z|)
## (Intercept) -0.57937     0.07673  -7.551 4.33e-14 ***
## GENDER2      0.28445     0.10243   2.777 0.00548 **
## ---
## Signif. codes:  0 '***' 0.001 '**' 0.01 '*' 0.05 '.' 0.1 ' ' 1
##
## (Dispersion parameter for binomial family taken to be 1)
##
##      Null deviance: 2183.3  on 1625  degrees of freedom
## Residual deviance: 2175.6  on 1624  degrees of freedom
## (4 observations deleted due to missingness)
## AIC: 2179.6
##
## Number of Fisher Scoring iterations: 4

confint(glm(PV01 ~ GENDER, data = SPAN, family = "binomial"))

## Waiting for profiling to be done...

##           2.5 %      97.5 %
## (Intercept) -0.7308947 -0.4299659
## GENDER2      0.0840615  0.4856619

```

```

# edu
summary(glm(PVol ~ EDU, data = SPAN, family = "binomial"))

##
## Call:
## glm(formula = PVol ~ EDU, family = "binomial", data = SPAN)
##
## Deviance Residuals:
##      Min       1Q   Median       3Q      Max
## -1.2385  -1.0838  -0.8062   1.2739   1.9284
##
## Coefficients:
##              Estimate Std. Error z value Pr(>|z|)
## (Intercept) -2.05648    0.19437 -10.580  <2e-16 ***
## EDU          0.36648    0.04129   8.875  <2e-16 ***
## ---
## Signif. codes:  0 '***' 0.001 '**' 0.01 '*' 0.05 '.' 0.1 ' ' 1
##
## (Dispersion parameter for binomial family taken to be 1)
##
##      Null deviance: 2177.6  on 1621  degrees of freedom
## Residual deviance: 2093.1  on 1620  degrees of freedom
##      (8 observations deleted due to missingness)
## AIC: 2097.1
##
## Number of Fisher Scoring iterations: 4

confint(glm(PVol ~ EDU, data = SPAN, family = "binomial"))

## Waiting for profiling to be done...

##              2.5 %    97.5 %
## (Intercept) -2.4423499 -1.680110
## EDU          0.2862636  0.448193

# age
summary(glm(PVol ~ AGE, data = SPAN, family = "binomial"))

##
## Call:
## glm(formula = PVol ~ AGE, family = "binomial", data = SPAN)
##
## Deviance Residuals:
##      Min       1Q   Median       3Q      Max
## -1.0327  -1.0067  -0.9912   1.3525   1.3875
##
## Coefficients:

```

```

##           Estimate Std. Error z value Pr(>|z|)
## (Intercept) -1.20200    1.10416  -1.089   0.276
## AGE          0.01310    0.01852   0.707   0.479
##
## (Dispersion parameter for binomial family taken to be 1)
##
## Null deviance: 2183.3 on 1625 degrees of freedom
## Residual deviance: 2182.8 on 1624 degrees of freedom
## (4 observations deleted due to missingness)
## AIC: 2186.8
##
## Number of Fisher Scoring iterations: 4

confinf(glm(PVol ~ AGE, data = SPAN, family = "binomial"))

## Waiting for profiling to be done...

##           2.5 %    97.5 %
## (Intercept) -3.36860275 0.9612772
## AGE          -0.02320325 0.0494288

# C predict volunteering, control: EDU, AGE, GENDER
VolC <- (glm(PVol ~ EDU + GENDER + AGE + pneoC, data = SPAN, family = "binomial"))
summary(VolC)

##
## Call:
## glm(formula = PVol ~ EDU + GENDER + AGE + pneoC, family = "binomial",
## data = SPAN)
##
## Deviance Residuals:
##    Min       1Q   Median       3Q      Max
## -1.4579 -1.0140 -0.7531  1.2064  2.0279
##
## Coefficients:
##           Estimate Std. Error z value Pr(>|z|)
## (Intercept) -3.94866    1.23329  -3.202 0.001366 **
## EDU          0.35393    0.04396   8.051 8.24e-16 ***
## GENDER2      0.39417    0.10975   3.592 0.000329 ***
## AGE          0.01401    0.01973   0.710 0.477650
## pneoC        0.35867    0.15371   2.333 0.019625 *
## ---
## Signif. codes:  0 '***' 0.001 '**' 0.01 '*' 0.05 '.' 0.1 ' ' 1
##
## (Dispersion parameter for binomial family taken to be 1)
##

```

```

## Null deviance: 2025.9 on 1501 degrees of freedom
## Residual deviance: 1932.1 on 1497 degrees of freedom
## (128 observations deleted due to missingness)
## AIC: 1942.1
##
## Number of Fisher Scoring iterations: 4

round(exp(cbind(OR = coef(VolC), confint(VolC))), 2)

## Waiting for profiling to be done...

## OR 2.5 % 97.5 %
## (Intercept) 0.02 0.00 0.21
## EDU 1.42 1.31 1.55
## GENDER2 1.48 1.20 1.84
## AGE 1.01 0.98 1.05
## pneoC 1.43 1.06 1.94

# C plus big 5 predict volunteer, control: EDU, AGE, GENDER
VolBig5 <- (glm(PVol ~ GENDER + AGE + EDU + pneoE + pneoA + pneoC + pneoN +
  pneo0, data = SPAN, family = "binomial"))
summary(VolBig5)

##
## Call:
## glm(formula = PVol ~ GENDER + AGE + EDU + pneoE + pneoA + pneoC +
## pneoN + pneo0, family = "binomial", data = SPAN)
##
## Deviance Residuals:
## Min 1Q Median 3Q Max
## -1.7903 -0.9877 -0.7043 1.1625 2.3082
##
## Coefficients:
## Estimate Std. Error z value Pr(>|z|)
## (Intercept) -5.33640 1.62794 -3.278 0.00105 **
## GENDER2 0.31199 0.12456 2.505 0.01226 *
## AGE 0.01228 0.02129 0.577 0.56410
## EDU 0.37809 0.05065 7.465 8.36e-14 ***
## pneoE 0.92727 0.18526 5.005 5.58e-07 ***
## pneoA 0.55720 0.20792 2.680 0.00737 **
## pneoC -0.21842 0.20378 -1.072 0.28380
## pneoN -0.22121 0.17720 -1.248 0.21191
## pneo0 -0.15941 0.17204 -0.927 0.35414
## ---
## Signif. codes: 0 '***' 0.001 '**' 0.01 '*' 0.05 '.' 0.1 ' ' 1
##
## (Dispersion parameter for binomial family taken to be 1)

```

```

##
## Null deviance: 1800.4 on 1332 degrees of freedom
## Residual deviance: 1667.1 on 1324 degrees of freedom
## (297 observations deleted due to missingness)
## AIC: 1685.1
##
## Number of Fisher Scoring iterations: 4

round(exp(cbind(OR = coef(VolBig5), confint(VolBig5))), 2)

## Waiting for profiling to be done...

## OR 2.5 % 97.5 %
## (Intercept) 0.00 0.00 0.12
## GENDER2 1.37 1.07 1.75
## AGE 1.01 0.97 1.06
## EDU 1.46 1.32 1.61
## pneoE 2.53 1.76 3.65
## pneoA 1.75 1.16 2.63
## pneoC 0.80 0.54 1.20
## pneoN 0.80 0.57 1.13
## pneoO 0.85 0.61 1.19

# Center Variables
SPAN$Con_C <- scale(SPAN$pneoC, center = TRUE, scale = FALSE)
SPAN$Agree_C <- scale(SPAN$pneoA, center = TRUE, scale = FALSE)
SPAN$Extr_C <- scale(SPAN$pneoE, center = TRUE, scale = FALSE)
SPAN$Open_C <- scale(SPAN$pneoO, center = TRUE, scale = FALSE)
SPAN$Neur_C <- scale(SPAN$pneoN, center = TRUE, scale = FALSE)
SPAN$EDU_C <- scale(SPAN$EDU, center = TRUE, scale = FALSE)
SPAN$AGE_C <- scale(SPAN$AGE, center = TRUE, scale = FALSE)

# Interaction term no controls
cxret <- glm(PVol ~ Con_C + retworkne + (Con_C * retworkne), data = SPAN, family = binomial)
summary(cxret)

##
## Call:
## glm(formula = PVol ~ Con_C + retworkne + (Con_C * retworkne),
## family = binomial, data = SPAN)
##
## Deviance Residuals:
## Min 1Q Median 3Q Max
## -1.3354 -1.0533 -0.8999 1.2909 1.9444
##
## Coefficients:
## Estimate Std. Error z value Pr(>|z|)

```

```

## (Intercept)      -0.33318    0.11509   -2.895    0.00379 **
## Con_C            0.99655    0.35334    2.820    0.00480 **
## reworkne1       0.03626    0.13305    0.273    0.78523
## reworkne2      -0.38553    0.18700   -2.062    0.03924 *
## Con_C:reworkne1 -0.74826    0.39896   -1.876    0.06072 .
## Con_C:reworkne2  0.17144    0.55301    0.310    0.75656
## ---
## Signif. codes:  0 '***' 0.001 '**' 0.01 '*' 0.05 '.' 0.1 ' ' 1
##
## (Dispersion parameter for binomial family taken to be 1)
##
## Null deviance: 1986.2 on 1468 degrees of freedom
## Residual deviance: 1958.1 on 1463 degrees of freedom
## (161 observations deleted due to missingness)
## AIC: 1970.1
##
## Number of Fisher Scoring iterations: 4

round(exp(cbind(OR = coef(cxret), confint(cxret))), 2)

## Waiting for profiling to be done...

##              OR 2.5 % 97.5 %
## (Intercept)   0.72 0.57  0.90
## Con_C         2.71 1.37  5.51
## reworkne1     1.04 0.80  1.35
## reworkne2     0.68 0.47  0.98
## Con_C:reworkne1 0.47 0.21  1.02
## Con_C:reworkne2 1.19 0.40  3.55

# Interaction term with EDU, Gender, Age, big 5
cxret <- glm(PVol ~ AGE_C + EDU_C + GENDER + Con_C + reworkne + Agree_C + Extr_C +
  Open_C + Neur_C + (Con_C * reworkne), data = SPAN, family = binomial)
summary(cxret)

##
## Call:
## glm(formula = PVol ~ AGE_C + EDU_C + GENDER + Con_C + reworkne +
## Agree_C + Extr_C + Open_C + Neur_C + (Con_C * reworkne),
## family = binomial, data = SPAN)
##
## Deviance Residuals:
##   Min       1Q   Median       3Q      Max
## -2.0017  -0.9944  -0.6814   1.1475   2.5080
##
## Coefficients:

```

```

##           Estimate Std. Error z value Pr(>|z|)
## (Intercept) -0.432231  0.149511 -2.891  0.00384 **
## AGE_C       0.003924  0.022471  0.175  0.86137
## EDU_C       0.370345  0.052752  7.021  2.21e-12 ***
## GENDER2     0.351502  0.126394  2.781  0.00542 **
## Con_C       0.491639  0.418555  1.175  0.24015
## reworkkne1 -0.197745  0.159067 -1.243  0.21381
## reworkkne2 -0.332862  0.216761 -1.536  0.12463
## Agree_C     0.579250  0.209978  2.759  0.00580 **
## Extr_C      0.974420  0.187836  5.188  2.13e-07 ***
## Open_C     -0.157474  0.174614 -0.902  0.36714
## Neur_C     -0.217337  0.180339 -1.205  0.22814
## Con_C:reworkkne1 -1.105190  0.454946 -2.429  0.01513 *
## Con_C:reworkkne2  0.026313  0.620628  0.042  0.96618
## ---
## Signif. codes:  0 '***' 0.001 '**' 0.01 '*' 0.05 '.' 0.1 ' ' 1
##
## (Dispersion parameter for binomial family taken to be 1)
##
## Null deviance: 1768.7 on 1306 degrees of freedom
## Residual deviance: 1628.0 on 1294 degrees of freedom
## (323 observations deleted due to missingness)
## AIC: 1654
##
## Number of Fisher Scoring iterations: 4

round(exp(cbind(OR = coef(cxret), confint(cxret))), 2)

## Waiting for profiling to be done...

##           OR 2.5 % 97.5 %
## (Intercept) 0.65 0.48 0.87
## AGE_C       1.00 0.96 1.05
## EDU_C       1.45 1.31 1.61
## GENDER2     1.42 1.11 1.82
## Con_C       1.63 0.73 3.79
## reworkkne1  0.82 0.60 1.12
## reworkkne2  0.72 0.47 1.09
## Agree_C     1.78 1.18 2.70
## Extr_C      2.65 1.84 3.84
## Open_C      0.85 0.61 1.20
## Neur_C      0.80 0.56 1.14
## Con_C:reworkkne1 0.33 0.13 0.80
## Con_C:reworkkne2 1.03 0.31 3.51

# Interaction graph #PDF 8.5 x 9

```

```

cxret <- glm(PVol ~ AGE_C + EDU_C + GENDER + Con_C + reworkne + Agree_C + Extr_C +
  Open_C + Neur_C + (Con_C * reworkne), data = SPAN, family = binomial)
cxret <- glm(PVol ~ Con_C + reworkne + (Con_C * reworkne), data = SPAN, family = binomial)
par(xpd = NA, oma = c(0.5, 0, 0, 8.4))
curve(1 - (1/(1 + exp(cxret$coeff["(Intercept)"] + (cxret$coeff["Con_C"]) *
  x))), xlim = c(-2, 2), ylim = c(0, 1), ylab = "Probability of Volunteering",
  xlab = "Conscientiousness", main = "Figure 1: SPAN \nConscientiousness and Work Status I",
  font = 1, lty = 1, lwd = 2, col = "gray48", cex.lab = 0.8, cex.main = 0.8,
  cex.axis = 0.8)
curve(1 - (1/(1 + exp(cxret$coeff["(Intercept)"] + cxret$coef["reworkne2"] *
  1 + (cxret$coeff["Con_C"] + cxret$coef["Con_C:reworkne2"] * 1) * x))),
  lty = 2, lwd = 2, col = "darkviolet", add = TRUE)
curve(1 - (1/(1 + exp(cxret$coeff["(Intercept)"] + cxret$coef["reworkne1"] *
  1 + (cxret$coeff["Con_C"] + cxret$coef["Con_C:reworkne1"] * 1) * x))),
  lty = 3, lwd = 2, col = "blue4", add = TRUE)
legend("right", inset = -0.6, bty = "n", cex = 0.7, legend = c("Retired", "Not employed",
  "Working"), lty = c(1, 2, 3), lwd = c(2, 2, 2), col = c("gray48", "darkviolet",
  "blue4"))

```



Figure 1: SPAN  
Conscientiousness and Work Status Interaction  
Predicting Volunteering

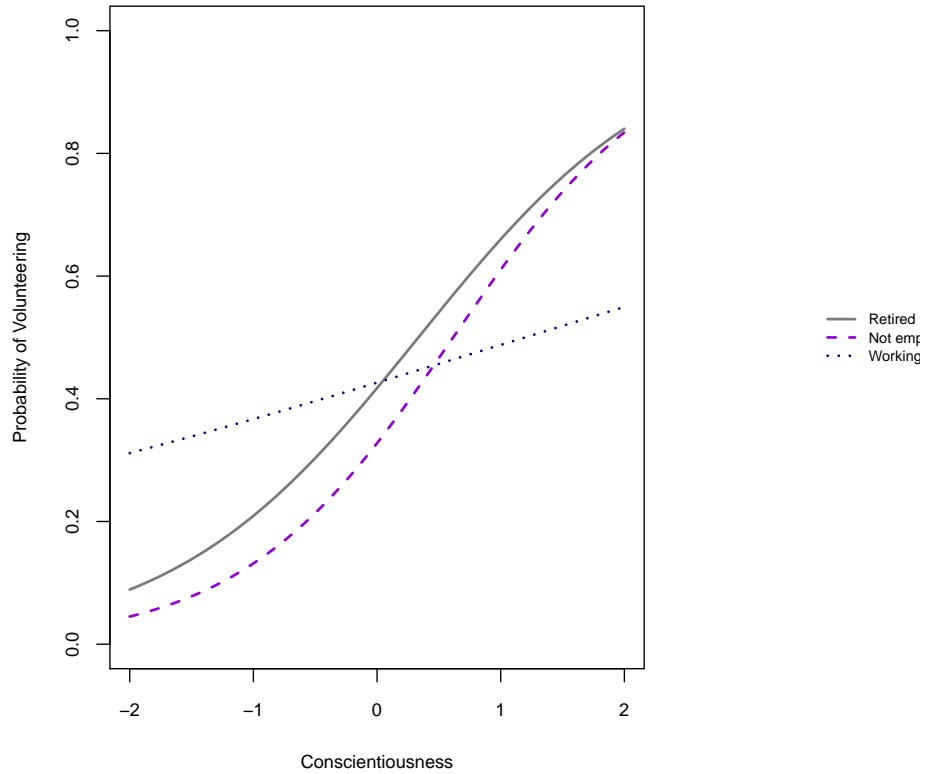

```
# hours with 0
SPAN$VolScale <- ifelse(SPAN$PVol == 0, SPAN$PVol, ifelse(SPAN$PVol > 0, SPAN$PVolHrs,
  NA))
# removing outliers
SPAN$VolScale80 <- SPAN$VolScale
SPAN$VolScale50 <- SPAN$VolScale80
SPAN$VolScale80[SPAN$VolScale80 == 80] <- NA
SPAN$VolScale50[SPAN$VolScale50 == 103] <- NA
table(SPAN$VolScale50)

##
## 0 0.23 0.25 0.37 0.5 0.62 0.75 1 1.5 1.57 1.75 2 2.25 2.5 2.81
## 982 1 5 1 12 2 2 57 17 1 2 71 1 11 1
## 3 3.25 3.5 4 4.25 4.5 5 5.5 5.69 6 6.5 6.7 7 7.5 8
## 53 1 9 58 1 6 44 3 1 20 7 1 11 6 24
## 8.23 8.5 9 10 10.7 11 11.5 12 13 13.5 14 15 15.2 16 16.5
```

```

##      1      1      7      23      1      6      2      6      7      2      3      6      1      3      1
##     17 17.5     18 19.5     20 20.2     21     22     23     24 24.5     25     26     30     32
##      2      1      6      1      8      1      3      2      2      1      1      5      2      5      1
##     35     36 37.5     40     42     44     45 46.5     50     80
##      1      1      1      2      1      1      1      1      1      1

```

table(SPAN\$VolScale80)

```

##
##      0 0.23 0.25 0.37 0.5 0.62 0.75      1 1.5 1.57 1.75      2 2.25 2.5 2.81
##    982      1      5      1     12      2      2     57     17      1      2     71      1     11      1
##      3 3.25 3.5      4 4.25 4.5      5 5.5 5.69      6 6.5 6.7      7 7.5      8
##     53      1      9     58      1      6     44      3      1     20      7      1     11      6     24
##    8.23 8.5      9     10 10.7     11 11.5     12     13 13.5     14     15 15.2     16 16.5
##      1      1      7     23      1      6      2      6      7      2      3      6      1      3      1
##     17 17.5     18 19.5     20 20.2     21     22     23     24 24.5     25     26     30     32
##      2      1      6      1      8      1      3      2      2      1      1      5      2      5      1
##     35     36 37.5     40     42     44     45 46.5     50     103
##      1      1      1      2      1      1      1      1      1      1

```

*# hours with 0, +.1, logs*

```

SPAN$VolScalelog <- log10(SPAN$VolScale + 0.1)
SPAN$VolScale80log <- log10(SPAN$VolScale80 + 0.1)
SPAN$VolScale50log <- log10(SPAN$VolScale50 + 0.1)
table(SPAN$VolScale80log)

```

```

##
##              -1 -0.481486060122112 -0.455931955649724
##              982                    1                    5
## -0.327902142064283 -0.221848749616356 -0.142667503568732
##                  1                    12                    2
## -0.0705810742857073 0.0413926851582251 0.204119982655925
##                  2                    57                    17
## 0.222716471147583 0.267171728403014 0.322219294733919
##                  1                    2                    71
## 0.371067862271736 0.414973347970818 0.463892988985907
##                  1                    11                    1
## 0.491361693834273 0.525044807036845 0.556302500767287
##                  53                    1                    9
## 0.612783856719735 0.638489256954637 0.662757831681574
##                  58                    1                    6
## 0.707570176097936 0.7481880270062 0.762678563727436
##                  44                    3                    1
## 0.785329835010767 0.819543935541869 0.832508912706236
##                  20                    7                    1
## 0.851258348719075 0.880813592280791 0.90848501887865

```

```

##          11          6          24
## 0.920645001406788 0.934498451243568 0.959041392321094
##          1          1          7
## 1.00432137378264 1.03342375548695 1.04532297878666
##          23          1          6
## 1.06445798922692 1.08278537031645 1.11727129565576
##          2          6          7
## 1.13353890837022 1.14921911265538 1.17897694729317
##          2          3          6
## 1.1846914308176 1.20682587603185 1.22010808804006
##          1          3          1
## 1.23299611039215 1.24551266781415 1.25767857486918
##          2          1          6
## 1.29225607135648 1.30319605742049 1.30749603791321
##          1          8          1
## 1.32428245529769 1.34439227368511 1.36361197989214
##          3          2          2
## 1.38201704257487 1.39093510710338 1.39967372148104
##          1          1          5
## 1.41664050733828 1.47856649559384 1.50650503240487
##          2          5          1
## 1.54530711646582 1.55750720190566 1.57518784492766
##          1          1          1
## 1.60314437262018 1.62428209583567 1.64443858946784
##          2          1          1
## 1.65417654187796 1.66838591669 1.69983772586725
##          1          1          1
## 2.01325866528352
##          1

```

```
table(SPAN$VolScale50log)
```

```

##
##          -1 -0.481486060122112 -0.455931955649724
##          982          1          5
## -0.327902142064283 -0.221848749616356 -0.142667503568732
##          1          12          2
## -0.0705810742857073 0.0413926851582251 0.204119982655925
##          2          57          17
## 0.222716471147583 0.267171728403014 0.322219294733919
##          1          2          71
## 0.371067862271736 0.414973347970818 0.463892988985907
##          1          11          1
## 0.491361693834273 0.525044807036845 0.556302500767287
##          53          1          9
## 0.612783856719735 0.638489256954637 0.662757831681574

```

```

##          58          1          6
## 0.707570176097936 0.7481880270062 0.762678563727436
##          44          3          1
## 0.785329835010767 0.819543935541869 0.832508912706236
##          20          7          1
## 0.851258348719075 0.880813592280791 0.90848501887865
##          11          6          24
## 0.920645001406788 0.934498451243568 0.959041392321094
##          1          1          7
## 1.00432137378264 1.03342375548695 1.04532297878666
##          23          1          6
## 1.06445798922692 1.08278537031645 1.11727129565576
##          2          6          7
## 1.13353890837022 1.14921911265538 1.17897694729317
##          2          3          6
## 1.1846914308176 1.20682587603185 1.22010808804006
##          1          3          1
## 1.23299611039215 1.24551266781415 1.25767857486918
##          2          1          6
## 1.29225607135648 1.30319605742049 1.30749603791321
##          1          8          1
## 1.32428245529769 1.34439227368511 1.36361197989214
##          3          2          2
## 1.38201704257487 1.39093510710338 1.39967372148104
##          1          1          5
## 1.41664050733828 1.47856649559384 1.50650503240487
##          2          5          1
## 1.54530711646582 1.55750720190566 1.57518784492766
##          1          1          1
## 1.60314437262018 1.62428209583567 1.64443858946784
##          2          1          1
## 1.65417654187796 1.66838591669 1.69983772586725
##          1          1          1
## 1.90363251608424
##          1

# interaction predicting log hors
summary(lm(VolScalelog ~ Con_C + retworkne + (Con_C * retworkne), data = SPAN))

##
## Call:
## lm(formula = VolScalelog ~ Con_C + retworkne + (Con_C * retworkne),
##     data = SPAN)
##
## Residuals:
##      Min       1Q   Median       3Q      Max

```

```

## -0.9506 -0.6161 -0.5428  0.8001  2.4992
##
## Coefficients:
##              Estimate Std. Error t value Pr(>|t|)
## (Intercept)   -0.32330    0.04707  -6.868 9.82e-12 ***
## Con_C         0.39147    0.13659   2.866  0.00422 **
## reworkne1    -0.07668    0.05469  -1.402  0.16110
## reworkne2    -0.13828    0.07432  -1.860  0.06303 .
## Con_C:reworkne1 -0.27397    0.15687  -1.746  0.08095 .
## Con_C:reworkne2  0.02569    0.20200   0.127  0.89880
## ---
## Signif. codes:  0 '***' 0.001 '**' 0.01 '*' 0.05 '.' 0.1 ' ' 1
##
## Residual standard error: 0.8184 on 1381 degrees of freedom
## (243 observations deleted due to missingness)
## Multiple R-squared:  0.0165, Adjusted R-squared:  0.01294
## F-statistic: 4.633 on 5 and 1381 DF,  p-value: 0.0003379

confint((lm(VolScalelog ~ Con_C + reworkne + (Con_C * reworkne), data = SPAN)))

##              2.5 %      97.5 %
## (Intercept)  -0.4156381 -0.230953121
## Con_C        0.1235198  0.659429403
## reworkne1    -0.1839691  0.030602908
## reworkne2    -0.2840725  0.007521364
## Con_C:reworkne1 -0.5816965  0.033757688
## Con_C:reworkne2 -0.3705717  0.421960971

interaction.plot(SPAN$Con_C, SPAN$reworkne, SPAN$VolScalelog)

```

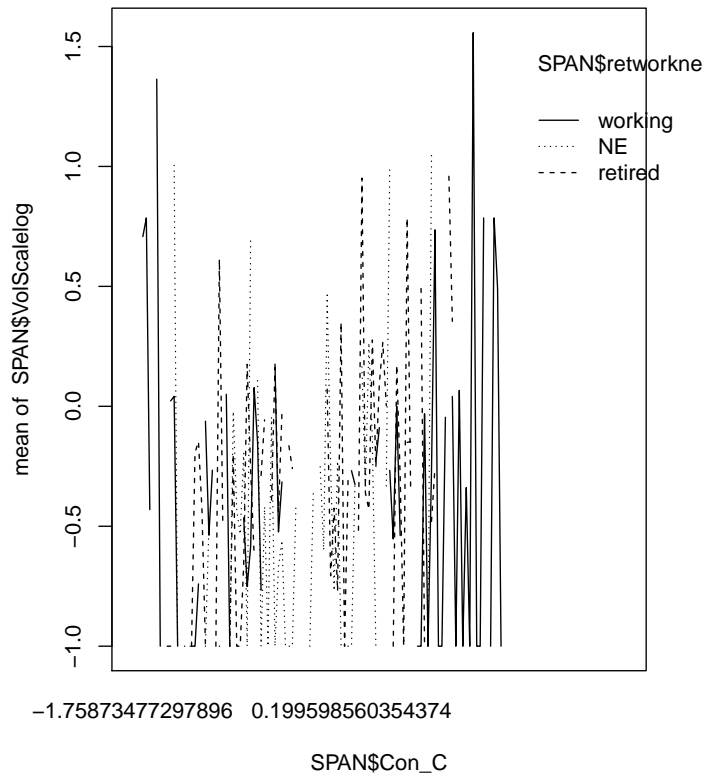

```

# other big five interaction term no controls
contrasts(SPAN$retworkne) #1working #2NE

##          [,1] [,2]
## NE          0    1
## retired     0    0
## working     1    0

axret <- glm(PVol ~ Agree_C + retworkne + (Agree_C * retworkne), data = SPAN,
             family = binomial)
summary(axret)

##
## Call:
## glm(formula = PVol ~ Agree_C + retworkne + (Agree_C * retworkne),
##      family = binomial, data = SPAN)

```

```

##
## Deviance Residuals:
##      Min       1Q   Median       3Q      Max
## -1.5338  -1.0353  -0.8601   1.2670   1.8338
##
## Coefficients:
##              Estimate Std. Error z value Pr(>|z|)
## (Intercept)   -0.35527   0.11764  -3.020 0.002529 **
## Agree_C       1.28921   0.39131   3.295 0.000986 ***
## retworkne1    0.04957   0.13537   0.366 0.714240
## retworkne2   -0.44878   0.18862  -2.379 0.017346 *
## Agree_C:retworkne1 -0.40515   0.44680  -0.907 0.364514
## Agree_C:retworkne2 -0.07834   0.60113  -0.130 0.896310
## ---
## Signif. codes:  0 '***' 0.001 '**' 0.01 '*' 0.05 '.' 0.1 ' ' 1
##
## (Dispersion parameter for binomial family taken to be 1)
##
##      Null deviance: 1980.8  on 1465  degrees of freedom
## Residual deviance: 1934.4  on 1460  degrees of freedom
## (164 observations deleted due to missingness)
## AIC: 1946.4
##
## Number of Fisher Scoring iterations: 4

round(exp(cbind(OR = coef(axret), confint(axret))), 2)

## Waiting for profiling to be done...

##              OR 2.5 % 97.5 %
## (Intercept)   0.70 0.56 0.88
## Agree_C       3.63 1.71 7.98
## retworkne1    1.05 0.81 1.37
## retworkne2    0.64 0.44 0.92
## Agree_C:retworkne1 0.67 0.27 1.58
## Agree_C:retworkne2 0.92 0.28 3.03

exret <- glm(PVol ~ Extr_C + retworkne + (Extr_C * retworkne), data = SPAN,
             family = binomial)
summary(exret)

##
## Call:
## glm(formula = PVol ~ Extr_C + retworkne + (Extr_C * retworkne),
##      family = binomial, data = SPAN)
##
## Deviance Residuals:

```

```

##      Min      1Q   Median      3Q      Max
## -1.5929 -1.0350 -0.8046  1.2286  2.5222
##
## Coefficients:
##              Estimate Std. Error z value Pr(>|z|)
## (Intercept)   -0.35006   0.11796  -2.967  0.0030 **
## Extr_C         1.41088   0.34007   4.149 3.34e-05 ***
## reworkne1     0.04409   0.13602   0.324  0.7458
## reworkne2    -0.43943   0.19249  -2.283  0.0224 *
## Extr_C:reworkne1 -0.55220  0.38332  -1.441  0.1497
## Extr_C:reworkne2  0.83677  0.62047   1.349  0.1775
## ---
## Signif. codes:  0 '***' 0.001 '**' 0.01 '*' 0.05 '.' 0.1 ' ' 1
##
## (Dispersion parameter for binomial family taken to be 1)
##
##      Null deviance: 1981.5  on 1465  degrees of freedom
## Residual deviance: 1904.4  on 1460  degrees of freedom
## (164 observations deleted due to missingness)
## AIC: 1916.4
##
## Number of Fisher Scoring iterations: 4

round(exp(cbind(OR = coef(exret), confint(exret))), 2)

## Waiting for profiling to be done...

##              OR 2.5 % 97.5 %
## (Intercept)   0.70  0.56  0.89
## Extr_C         4.10  2.14  8.16
## reworkne1     1.05  0.80  1.37
## reworkne2     0.64  0.44  0.94
## Extr_C:reworkne1 0.58  0.27  1.20
## Extr_C:reworkne2 2.31  0.70  8.01

oxret <- glm(PVol ~ Open_C + reworkne + (Open_C * reworkne), data = SPAN,
             family = binomial)
summary(oxret)

##
## Call:
## glm(formula = PVol ~ Open_C + reworkne + (Open_C * reworkne),
##      family = binomial, data = SPAN)
##
## Deviance Residuals:
##      Min       1Q   Median       3Q      Max
## -1.7665 -1.0375 -0.9327  1.2954  2.0821

```



```

##
## Coefficients:
##           Estimate Std. Error z value Pr(>|z|)
## (Intercept)   -0.32308    0.11499  -2.810  0.00496 **
## Open_C         0.45524    0.31633   1.439  0.15012
## reworkne1     -0.01245    0.13313  -0.094  0.92548
## reworkne2     -0.42192    0.18951  -2.226  0.02599 *
## Open_C:reworkne1 -0.06395    0.36069  -0.177  0.85926
## Open_C:reworkne2  1.36255    0.53520   2.546  0.01090 *
## ---
## Signif. codes:  0 '***' 0.001 '**' 0.01 '*' 0.05 '.' 0.1 ' ' 1
##
## (Dispersion parameter for binomial family taken to be 1)
##
## Null deviance: 1969.2 on 1459 degrees of freedom
## Residual deviance: 1933.5 on 1454 degrees of freedom
## (170 observations deleted due to missingness)
## AIC: 1945.5
##
## Number of Fisher Scoring iterations: 4

round(exp(cbind(OR = coef(oxret), confint(oxret))), 2)

## Waiting for profiling to be done...

##           OR 2.5 % 97.5 %
## (Intercept)   0.72 0.58 0.91
## Open_C         1.58 0.85 2.95
## reworkne1     0.99 0.76 1.28
## reworkne2     0.66 0.45 0.95
## Open_C:reworkne1 0.94 0.46 1.90
## Open_C:reworkne2 3.91 1.39 11.40

nxret <- glm(PVol ~ Neur_C + reworkne + (Neur_C * reworkne), data = SPAN,
             family = binomial)
summary(nxret)

##
## Call:
## glm(formula = PVol ~ Neur_C + reworkne + (Neur_C * reworkne),
##      family = binomial, data = SPAN)
##
## Deviance Residuals:
##      Min       1Q   Median       3Q      Max
## -1.4046  -1.0464  -0.8824   1.2713   1.9255
##
## Coefficients:

```

```

##              Estimate Std. Error z value Pr(>|z|)
## (Intercept)   -0.39406    0.11712  -3.365 0.000766 ***
## Neur_C        -0.93206    0.31480  -2.961 0.003069 **
## reworkne1     0.07342    0.13477   0.545 0.585877
## reworkne2    -0.31705    0.19165  -1.654 0.098066 .
## Neur_C:reworkne1 0.48225    0.35012   1.377 0.168395
## Neur_C:reworkne2 -0.36679    0.50035  -0.733 0.463524
## ---
## Signif. codes:  0 '***' 0.001 '**' 0.01 '*' 0.05 '.' 0.1 ' ' 1
##
## (Dispersion parameter for binomial family taken to be 1)
##
##    Null deviance: 1982.6  on 1469  degrees of freedom
## Residual deviance: 1941.5  on 1464  degrees of freedom
## (160 observations deleted due to missingness)
## AIC: 1953.5
##
## Number of Fisher Scoring iterations: 4

round(exp(cbind(OR = coef(nxret), confint(nxret))), 2)

## Waiting for profiling to be done...

##              OR 2.5 % 97.5 %
## (Intercept)    0.67 0.53 0.85
## Neur_C          0.39 0.21 0.72
## reworkne1      1.08 0.83 1.40
## reworkne2      0.73 0.50 1.06
## Neur_C:reworkne1 1.62 0.82 3.26
## Neur_C:reworkne2 0.69 0.26 1.83

# openness sig, add covariates
oxret <- glm(PVol ~ AGE_C + GENDER + Con_C + reworkne + Agree_C + Extr_C +
  Open_C + Neur_C + (Open_C * reworkne), data = SPAN, family = binomial)
summary(oxret)

##
## Call:
## glm(formula = PVol ~ AGE_C + GENDER + Con_C + reworkne + Agree_C +
##     Extr_C + Open_C + Neur_C + (Open_C * reworkne), family = binomial,
##     data = SPAN)
##
## Deviance Residuals:
##    Min       1Q   Median       3Q      Max
## -1.6605 -1.0217 -0.7694  1.2145  2.3316
##

```

```

## Coefficients:
##              Estimate Std. Error z value Pr(>|z|)
## (Intercept)  -0.4461740  0.1437512  -3.104  0.00191 **
## AGE_C        0.0051439  0.0220412   0.233  0.81547
## GENDER2     0.2099331  0.1227446   1.710  0.08721 .
## Con_C       -0.0334136  0.2004605  -0.167  0.86762
## retworkne1  0.0009532  0.1512749   0.006  0.99497
## retworkne2  -0.4206013  0.2125133  -1.979  0.04780 *
## Agree_C     0.5695330  0.2063643   2.760  0.00578 **
## Extr_C      0.8004867  0.1822571   4.392  1.12e-05 ***
## Open_C     -0.0440327  0.3579841  -0.123  0.90211
## Neur_C     -0.2272241  0.1770216  -1.284  0.19928
## retworkne1:Open_C 0.0939531  0.3992486   0.235  0.81396
## retworkne2:Open_C 1.3050022  0.5760592   2.265  0.02349 *
## ---
## Signif. codes:  0 '***' 0.001 '**' 0.01 '*' 0.05 '.' 0.1 ' ' 1
##
## (Dispersion parameter for binomial family taken to be 1)
##
##    Null deviance: 1772.6  on 1309  degrees of freedom
## Residual deviance: 1686.9  on 1298  degrees of freedom
## (320 observations deleted due to missingness)
## AIC: 1710.9
##
## Number of Fisher Scoring iterations: 4

round(exp(cbind(OR = coef(oxret), confint(oxret))), 2)

## Waiting for profiling to be done...

##              OR 2.5 % 97.5 %
## (Intercept)    0.64  0.48  0.85
## AGE_C          1.01  0.96  1.05
## GENDER2       1.23  0.97  1.57
## Con_C         0.97  0.65  1.43
## retworkne1    1.00  0.74  1.35
## retworkne2    0.66  0.43  0.99
## Agree_C      1.77  1.18  2.66
## Extr_C       2.23  1.56  3.19
## Open_C       0.96  0.47  1.94
## Neur_C       0.80  0.56  1.13
## retworkne1:Open_C 1.10  0.50  2.40
## retworkne2:Open_C 3.69  1.21 11.68

SPAN2 <- subset(SPAN, select = c(PID, PNEOC11, PNEOC12, PNEOC13, PNEOC14, PNEOC15,
PNEOC16, PNEOC17, PNEOC18, PNEOC21, PNEOC22, PNEOC23, PNEOC24, PNEOC25,

```

```

PNEOC26, PNEOC27, PNEOC28, PNEOC31, PNEOC32, PNEOC33, PNEOC34, PNEOC35,
PNEOC36, PNEOC37, PNEOC38, PNEOC41, PNEOC42, PNEOC43, PNEOC44, PNEOC45,
PNEOC46, PNEOC47, PNEOC48, PNEOC51, PNEOC52, PNEOC53, PNEOC54, PNEOC55,
PNEOC56, PNEOC57, PNEOC58, PNEOC61, PNEOC62, PNEOC63, PNEOC64, PNEOC65,
PNEOC66, PNEOC67, PNEOC68))
write.csv(SPAN2, "SPAN2.csv")

# facets
SPAN$Resp <- ((SPAN$PNEOC11 + (5 - SPAN$PNEOC12) + SPAN$PNEOC13 + (5 - SPAN$PNEOC14) +
  SPAN$PNEOC15 + (5 - SPAN$PNEOC16) + SPAN$PNEOC17 + SPAN$PNEOC18)/8)
SPAN$Order <- (((5 - SPAN$PNEOC21) + SPAN$PNEOC22 + (5 - SPAN$PNEOC23) + SPAN$PNEOC24 +
  (5 - SPAN$PNEOC25) + SPAN$PNEOC26 + (5 - SPAN$PNEOC27) + (5 - SPAN$PNEOC28))/8)
SPAN$Duti <- ((SPAN$PNEOC31 + (5 - SPAN$PNEOC32) + SPAN$PNEOC33 + (5 - SPAN$PNEOC34) +
  SPAN$PNEOC35 + SPAN$PNEOC36 + SPAN$PNEOC37 + SPAN$PNEOC38)/8)
SPAN$AS <- (((5 - SPAN$PNEOC41) + SPAN$PNEOC42 + (5 - SPAN$PNEOC43) + SPAN$PNEOC44 +
  (5 - SPAN$PNEOC45) + SPAN$PNEOC46 + SPAN$PNEOC47 + SPAN$PNEOC48)/8)
SPAN$SD <- ((SPAN$PNEOC51 + (5 - SPAN$PNEOC52) + SPAN$PNEOC53 + SPAN$PNEOC54 +
  SPAN$PNEOC55 + (5 - SPAN$PNEOC56) + (5 - SPAN$PNEOC57) + SPAN$PNEOC58)/8)
SPAN$Delib <- (((5 - SPAN$PNEOC61) + SPAN$PNEOC62 + (5 - SPAN$PNEOC63) + SPAN$PNEOC64 +
  (5 - SPAN$PNEOC65) + SPAN$PNEOC66 + SPAN$PNEOC67 + SPAN$PNEOC68)/8)

SPAN$Resp_C <- scale(SPAN$Resp, center = TRUE, scale = FALSE)
SPAN$Order_C <- scale(SPAN$Order, center = TRUE, scale = FALSE)
SPAN$Duti_C <- scale(SPAN$Duti, center = TRUE, scale = FALSE)
SPAN$AS_C <- scale(SPAN$AS, center = TRUE, scale = FALSE)
SPAN$SD_C <- scale(SPAN$SD, center = TRUE, scale = FALSE)
SPAN$Delib_C <- scale(SPAN$Delib, center = TRUE, scale = FALSE)

# responsibility C predict volunteering, control: EDU, AGE, GENDER
Resp <- (glm(PVol ~ EDU + GENDER + AGE + Resp_C, data = SPAN, family = "binomial"))
summary(Resp)

##
## Call:
## glm(formula = PVol ~ EDU + GENDER + AGE + Resp_C, family = "binomial",
## data = SPAN)
##
## Deviance Residuals:
## Min 1Q Median 3Q Max
## -1.4007 -1.0131 -0.7506 1.1999 2.0520
##
## Coefficients:
## Estimate Std. Error z value Pr(>|z|)
## (Intercept) -3.20693 1.17092 -2.739 0.006166 **
## EDU 0.36977 0.04220 8.763 < 2e-16 ***

```

```

## GENDER2      0.36291    0.10724    3.384 0.000714 ***
## AGE          0.01601    0.01931    0.829 0.406971
## Resp_C      -0.25876    0.20851   -1.241 0.214625
## ---
## Signif. codes:  0 '***' 0.001 '**' 0.01 '*' 0.05 '.' 0.1 ' ' 1
##
## (Dispersion parameter for binomial family taken to be 1)
##
## Null deviance: 2122.6 on 1575 degrees of freedom
## Residual deviance: 2030.4 on 1571 degrees of freedom
## (54 observations deleted due to missingness)
## AIC: 2040.4
##
## Number of Fisher Scoring iterations: 4

round(exp(cbind(OR = coef(Resp), confint(Resp))), 2)

## Waiting for profiling to be done...

##              OR 2.5 % 97.5 %
## (Intercept) 0.04  0.00   0.40
## EDU          1.45  1.33   1.57
## GENDER2     1.44  1.17   1.77
## AGE         1.02  0.98   1.06
## Resp_C      0.77  0.51   1.16

# C plus big 5 predict volunteer, control: EDU, AGE, GENDER
Resp <- (glm(PVol ~ GENDER + AGE + EDU + pneoE + pneoA + pneoN + pneoO + Resp_C,
  data = SPAN, family = "binomial"))
summary(Resp)

##
## Call:
## glm(formula = PVol ~ GENDER + AGE + EDU + pneoE + pneoA + pneoN +
##     pneoO + Resp_C, family = "binomial", data = SPAN)
##
## Deviance Residuals:
##   Min       1Q   Median       3Q      Max
## -1.7757  -0.9889  -0.7013   1.1471   2.3236
##
## Coefficients:
##              Estimate Std. Error z value Pr(>|z|)
## (Intercept) -5.619311   1.531890  -3.668 0.000244 ***
## GENDER2     0.304339   0.123816   2.458 0.013971 *
## AGE         0.009161   0.021206   0.432 0.665739
## EDU         0.370853   0.049463   7.498 6.50e-14 ***
## pneoE       0.905329   0.182724   4.955 7.25e-07 ***

```

```

## pneoA      0.522354  0.206576  2.529 0.011451 *
## pneoN     -0.199971  0.155594 -1.285 0.198720
## pneoO     -0.139472  0.171108 -0.815 0.415009
## Resp_C    -0.558020  0.235448 -2.370 0.017787 *
## ---
## Signif. codes:  0 '***' 0.001 '**' 0.01 '*' 0.05 '.' 0.1 ' ' 1
##
## (Dispersion parameter for binomial family taken to be 1)
##
## Null deviance: 1831.5 on 1356 degrees of freedom
## Residual deviance: 1691.6 on 1348 degrees of freedom
## (273 observations deleted due to missingness)
## AIC: 1709.6
##
## Number of Fisher Scoring iterations: 4

round(exp(cbind(OR = coef(Resp), confint(Resp))), 2)

## Waiting for profiling to be done...

##          OR 2.5 % 97.5 %
## (Intercept) 0.00  0.00  0.07
## GENDER2     1.36  1.06  1.73
## AGE         1.01  0.97  1.05
## EDU         1.45  1.32  1.60
## pneoE       2.47  1.73  3.55
## pneoA       1.69  1.13  2.53
## pneoN       0.82  0.60  1.11
## pneoO       0.87  0.62  1.22
## Resp_C      0.57  0.36  0.91

# interaction
Resp <- glm(PVol ~ AGE_C + EDU_C + GENDER + Resp_C + retworkne + (Resp_C * retworkne),
  data = SPAN, family = binomial)
summary(Resp)

##
## Call:
## glm(formula = PVol ~ AGE_C + EDU_C + GENDER + Resp_C + retworkne +
## (Resp_C * retworkne), family = binomial, data = SPAN)
##
## Deviance Residuals:
##   Min       1Q   Median       3Q      Max
## -1.4402 -1.0219 -0.7627  1.1945  2.1405
##
## Coefficients:
##              Estimate Std. Error z value Pr(>|z|)

```

```

## (Intercept)      -0.466839    0.130210   -3.585 0.000337 ***
## AGE_C            0.005888    0.020317    0.290 0.771969
## EDU_C            0.353696    0.043809    8.074 6.83e-16 ***
## GENDER2          0.388894    0.108693    3.578 0.000346 ***
## Resp_C          -0.325278    0.454820   -0.715 0.474498
## reworkne1       -0.153997    0.139415   -1.105 0.269334
## reworkne2       -0.432227    0.189550   -2.280 0.022591 *
## Resp_C:reworkne1 0.181607    0.529629    0.343 0.731677
## Resp_C:reworkne2 0.015196    0.674676    0.023 0.982031
## ---
## Signif. codes:  0 '***' 0.001 '**' 0.01 '*' 0.05 '.' 0.1 ' ' 1
##
## (Dispersion parameter for binomial family taken to be 1)
##
## Null deviance: 2077.1 on 1537 degrees of freedom
## Residual deviance: 1985.3 on 1529 degrees of freedom
## (92 observations deleted due to missingness)
## AIC: 2003.3
##
## Number of Fisher Scoring iterations: 4

round(exp(cbind(OR = coef(Resp), confint(Resp))), 2)

## Waiting for profiling to be done...

##              OR 2.5 % 97.5 %
## (Intercept)  0.63 0.48  0.81
## AGE_C        1.01 0.97  1.05
## EDU_C        1.42 1.31  1.55
## GENDER2      1.48 1.19  1.83
## Resp_C       0.72 0.29  1.76
## reworkne1    0.86 0.65  1.13
## reworkne2    0.65 0.45  0.94
## Resp_C:reworkne1 1.20 0.42  3.40
## Resp_C:reworkne2 1.02 0.27  3.83

# Interaction term with EDU, Gender, Age, big 5
Resp <- glm(PVol ~ AGE_C + EDU_C + GENDER + Resp_C + reworkne + Agree_C + Extr_C +
  Open_C + Neur_C + (Resp_C * reworkne), data = SPAN, family = binomial)
summary(Resp)

##
## Call:
## glm(formula = PVol ~ AGE_C + EDU_C + GENDER + Resp_C + reworkne +
## Agree_C + Extr_C + Open_C + Neur_C + (Resp_C * reworkne),
## family = binomial, data = SPAN)

```

```

##
## Deviance Residuals:
##      Min       1Q   Median       3Q      Max
## -1.8086  -0.9925  -0.6853   1.1449   2.2967
##
## Coefficients:
##              Estimate Std. Error z value Pr(>|z|)
## (Intercept)  -0.4384401  0.1472131  -2.978  0.00290 **
## AGE_C        -0.0003641  0.0223174  -0.016  0.98698
## EDU_C         0.3605054  0.0513935   7.015 2.31e-12 ***
## GENDER2      0.3231125  0.1251662   2.581  0.00984 **
## Resp_C      -0.7085918  0.5334202  -1.328  0.18405
## retworkne1  -0.1905245  0.1567167  -1.216  0.22409
## retworkne2  -0.3751904  0.2117952  -1.771  0.07648 .
## Agree_C      0.5420273  0.2079333   2.607  0.00914 **
## Extr_C       0.9074591  0.1838343   4.936 7.96e-07 ***
## Open_C      -0.1347319  0.1730769  -0.778  0.43630
## Neur_C      -0.1716973  0.1582943  -1.085  0.27807
## Resp_C:retworkne1  0.3134569  0.6103790   0.514  0.60757
## Resp_C:retworkne2 -0.0816501  0.7730797  -0.106  0.91589
## ---
## Signif. codes:  0 '***' 0.001 '**' 0.01 '*' 0.05 '.' 0.1 ' ' 1
##
## (Dispersion parameter for binomial family taken to be 1)
##
##      Null deviance: 1797.7  on 1328  degrees of freedom
## Residual deviance: 1660.2  on 1316  degrees of freedom
## (301 observations deleted due to missingness)
## AIC: 1686.2
##
## Number of Fisher Scoring iterations: 4

round(exp(cbind(OR = coef(Resp), confint(Resp))), 2)

## Waiting for profiling to be done...

##              OR 2.5 % 97.5 %
## (Intercept)    0.65  0.48  0.86
## AGE_C          1.00  0.96  1.04
## EDU_C          1.43  1.30  1.59
## GENDER2        1.38  1.08  1.77
## Resp_C         0.49  0.17  1.40
## retworkne1     0.83  0.61  1.12
## retworkne2     0.69  0.45  1.04
## Agree_C        1.72  1.15  2.59
## Extr_C         2.48  1.73  3.57

```



```

## Open_C          0.87  0.62  1.23
## Neur_C          0.84  0.62  1.15
## Resp_C:reworkne1 1.37  0.41  4.56
## Resp_C:reworkne2 0.92  0.20  4.22

# ORDER C predict volunteering, control: EDU, AGE, GENDER
Order <- (glm(PVol ~ EDU + GENDER + AGE + Order_C, data = SPAN, family = "binomial"))
summary(Order)

##
## Call:
## glm(formula = PVol ~ EDU + GENDER + AGE + Order_C, family = "binomial",
##      data = SPAN)
##
## Deviance Residuals:
##      Min       1Q   Median       3Q      Max
## -1.4633  -1.0091  -0.7543   1.2044   2.1286
##
## Coefficients:
##              Estimate Std. Error z value Pr(>|z|)
## (Intercept) -3.20966     1.17298  -2.736 0.006213 **
## EDU          0.36302     0.04274   8.494 < 2e-16 ***
## GENDER2     0.37132     0.10767   3.449 0.000563 ***
## AGE         0.01636     0.01933   0.846 0.397571
## Order_C    -0.40256     0.17313  -2.325 0.020058 *
## ---
## Signif. codes:  0 '***' 0.001 '**' 0.01 '*' 0.05 '.' 0.1 ' ' 1
##
## (Dispersion parameter for binomial family taken to be 1)
##
##      Null deviance: 2115.3  on 1571  degrees of freedom
## Residual deviance: 2016.7  on 1567  degrees of freedom
##      (58 observations deleted due to missingness)
## AIC: 2026.7
##
## Number of Fisher Scoring iterations: 4

round(exp(cbind(OR = coef(Order), confint(Order))), 2)

## Waiting for profiling to be done...

##              OR 2.5 % 97.5 %
## (Intercept) 0.04  0.00  0.40
## EDU         1.44  1.32  1.56
## GENDER2     1.45  1.17  1.79
## AGE         1.02  0.98  1.06
## Order_C     0.67  0.48  0.94

```

```

# C plus big 5 predict volunteer, control: EDU, AGE, GENDER
Order <- (glm(PVol ~ GENDER + AGE + EDU + pneoE + pneoA + pneoN + pneoO + Order_C,
  data = SPAN, family = "binomial"))
summary(Order)

##
## Call:
## glm(formula = PVol ~ GENDER + AGE + EDU + pneoE + pneoA + pneoN +
##     pneoO + Order_C, family = "binomial", data = SPAN)
##
## Deviance Residuals:
##      Min       1Q   Median       3Q      Max
## -1.8539  -0.9749  -0.7013   1.1542   2.2924
##
## Coefficients:
##              Estimate Std. Error z value Pr(>|z|)
## (Intercept) -6.05500     1.54133  -3.928 8.55e-05 ***
## GENDER2      0.31660     0.12380   2.557  0.0105 *
## AGE          0.01185     0.02122   0.559  0.5764
## EDU          0.36730     0.04988   7.364 1.78e-13 ***
## pneoE        0.86873     0.18116   4.795 1.62e-06 ***
## pneoA        0.58006     0.20713   2.800  0.0051 **
## pneoN       -0.09519     0.16014  -0.594  0.5522
## pneoO       -0.11640     0.17113  -0.680  0.4964
## Order_C     -0.26953     0.19756  -1.364  0.1725
## ---
## Signif. codes:  0 '***' 0.001 '**' 0.01 '*' 0.05 '.' 0.1 ' ' 1
##
## (Dispersion parameter for binomial family taken to be 1)
##
##      Null deviance: 1825.8  on 1352  degrees of freedom
## Residual deviance: 1687.1  on 1344  degrees of freedom
## (277 observations deleted due to missingness)
## AIC: 1705.1
##
## Number of Fisher Scoring iterations: 4

round(exp(cbind(OR = coef(Order), confint(Order))), 2)

## Waiting for profiling to be done...

##              OR 2.5 % 97.5 %
## (Intercept) 0.00 0.00  0.05
## GENDER2     1.37 1.08  1.75
## AGE         1.01 0.97  1.05
## EDU         1.44 1.31  1.59

```

```

## pneoE      2.38  1.68  3.41
## pneoA      1.79  1.19  2.69
## pneoN      0.91  0.66  1.24
## pneoO      0.89  0.64  1.24
## Order_C    0.76  0.52  1.12

# interaction
Order <- glm(PVol ~ AGE_C + EDU_C + GENDER + Order_C + retworkne + (Order_C *
  retworkne), data = SPAN, family = binomial)
summary(Order)

##
## Call:
## glm(formula = PVol ~ AGE_C + EDU_C + GENDER + Order_C + retworkne +
##      (Order_C * retworkne), family = binomial, data = SPAN)
##
## Deviance Residuals:
##      Min       1Q   Median       3Q      Max
## -1.6956  -1.0164  -0.7511   1.1960   2.0212
##
## Coefficients:
##              Estimate Std. Error z value Pr(>|z|)
## (Intercept)  -0.509228   0.131146  -3.883 0.000103 ***
## AGE_C         0.009478   0.020352   0.466 0.641434
## EDU_C         0.350382   0.044261   7.916 2.45e-15 ***
## GENDER2       0.394006   0.109191   3.608 0.000308 ***
## Order_C      -0.991643   0.407037  -2.436 0.014840 *
## retworkne1   -0.113775   0.140375  -0.811 0.417647
## retworkne2   -0.344807   0.191375  -1.802 0.071587 .
## Order_C:retworkne1  0.843345   0.459963   1.834 0.066727 .
## Order_C:retworkne2  0.425966   0.612906   0.695 0.487060
## ---
## Signif. codes:  0 '***' 0.001 '**' 0.01 '*' 0.05 '.' 0.1 ' ' 1
##
## (Dispersion parameter for binomial family taken to be 1)
##
##      Null deviance: 2067.0  on 1531  degrees of freedom
## Residual deviance: 1968.2  on 1523  degrees of freedom
## (98 observations deleted due to missingness)
## AIC: 1986.2
##
## Number of Fisher Scoring iterations: 4

round(exp(cbind(OR = coef(Order), confint(Order))), 2)

## Waiting for profiling to be done...

```

```

##              OR 2.5 % 97.5 %
## (Intercept)    0.60  0.46  0.78
## AGE_C          1.01  0.97  1.05
## EDU_C          1.42  1.30  1.55
## GENDER2       1.48  1.20  1.84
## Order_C       0.37  0.16  0.82
## retworkne1    0.89  0.68  1.18
## retworkne2    0.71  0.49  1.03
## Order_C:retworkne1 2.32  0.95  5.80
## Order_C:retworkne2 1.53  0.46  5.11

# Interaction term with EDU, Gender, Age, big 5
Order <- glm(PVol ~ AGE_C + EDU_C + GENDER + Order_C + retworkne + Agree_C +
  Extr_C + Open_C + Neur_C + (Order_C * retworkne), data = SPAN, family = binomial)
summary(Order)

##
## Call:
## glm(formula = PVol ~ AGE_C + EDU_C + GENDER + Order_C + retworkne +
##     Agree_C + Extr_C + Open_C + Neur_C + (Order_C * retworkne),
##     family = binomial, data = SPAN)
##
## Deviance Residuals:
##      Min       1Q   Median       3Q      Max
## -1.8248  -0.9938  -0.6780   1.1357   2.3432
##
## Coefficients:
##              Estimate Std. Error z value Pr(>|z|)
## (Intercept)  -0.443983   0.148913  -2.981  0.00287 **
## AGE_C         0.001797   0.022357   0.080  0.93595
## EDU_C         0.367482   0.052034   7.062 1.64e-12 ***
## GENDER2       0.345335   0.125545   2.751  0.00595 **
## Order_C      -1.462721   0.493956  -2.961  0.00306 **
## retworkne1   -0.197020   0.158185  -1.245  0.21295
## retworkne2   -0.351378   0.214125  -1.641  0.10080
## Agree_C       0.572085   0.209068   2.736  0.00621 **
## Extr_C        0.883203   0.183513   4.813 1.49e-06 ***
## Open_C       -0.119368   0.173827  -0.687  0.49227
## Neur_C       -0.106923   0.163521  -0.654  0.51319
## Order_C:retworkne1 1.563509   0.546618   2.860  0.00423 **
## Order_C:retworkne2 0.984086   0.709779   1.386  0.16560
## ---
## Signif. codes:  0 '***' 0.001 '**' 0.01 '*' 0.05 '.' 0.1 ' ' 1
##
## (Dispersion parameter for binomial family taken to be 1)
##

```

```

## Null deviance: 1792.0 on 1324 degrees of freedom
## Residual deviance: 1647.2 on 1312 degrees of freedom
## (305 observations deleted due to missingness)
## AIC: 1673.2
##
## Number of Fisher Scoring iterations: 4

round(exp(cbind(OR = coef(Order), confint(Order))), 2)

## Waiting for profiling to be done...

##              OR 2.5 % 97.5 %
## (Intercept)  0.64 0.48  0.86
## AGE_C        1.00 0.96  1.05
## EDU_C        1.44 1.31  1.60
## GENDER2      1.41 1.10  1.81
## Order_C      0.23 0.09  0.60
## reworkne1    0.82 0.60  1.12
## reworkne2    0.70 0.46  1.07
## Agree_C      1.77 1.18  2.68
## Extr_C       2.42 1.69  3.48
## Open_C       0.89 0.63  1.25
## Neur_C       0.90 0.65  1.24
## Order_C:reworkne1 4.78 1.66 14.26
## Order_C:reworkne2 2.68 0.67 10.87

# AS C predict volunteering, control: EDU, AGE, GENDER
AS <- (glm(PVol ~ EDU + GENDER + AGE + AS_C, data = SPAN, family = "binomial"))
summary(AS)

##
## Call:
## glm(formula = PVol ~ EDU + GENDER + AGE + AS_C, family = "binomial",
##      data = SPAN)
##
## Deviance Residuals:
##      Min       1Q   Median       3Q      Max
## -1.3600  -1.0087  -0.7467   1.1997   2.0374
##
## Coefficients:
##              Estimate Std. Error z value Pr(>|z|)
## (Intercept) -3.21621     1.17079  -2.747 0.006014 **
## EDU          0.37752     0.04209   8.970 < 2e-16 ***
## GENDER2      0.35468     0.10705   3.313 0.000923 ***
## AGE          0.01548     0.01929   0.802 0.422317
## AS_C         0.04128     0.15136   0.273 0.785042
## ---

```

```

## Signif. codes:  0 '***' 0.001 '**' 0.01 '*' 0.05 '.' 0.1 ' ' 1
##
## (Dispersion parameter for binomial family taken to be 1)
##
## Null deviance: 2128.1 on 1582 degrees of freedom
## Residual deviance: 2033.4 on 1578 degrees of freedom
## (47 observations deleted due to missingness)
## AIC: 2043.4
##
## Number of Fisher Scoring iterations: 4

round(exp(cbind(OR = coef(AS), confint(AS))), 2)

## Waiting for profiling to be done...

## OR 2.5 % 97.5 %
## (Intercept) 0.04 0.00 0.40
## EDU 1.46 1.34 1.59
## GENDER2 1.43 1.16 1.76
## AGE 1.02 0.98 1.05
## AS_C 1.04 0.77 1.40

# C plus big 5 predict volunteer, control: EDU, AGE, GENDER
AS <- (glm(PVol ~ GENDER + AGE + EDU + pneoE + pneoA + pneoN + pneoO + AS_C,
  data = SPAN, family = "binomial"))
summary(AS)

##
## Call:
## glm(formula = PVol ~ GENDER + AGE + EDU + pneoE + pneoA + pneoN +
## pneoO + AS_C, family = "binomial", data = SPAN)
##
## Deviance Residuals:
## Min 1Q Median 3Q Max
## -1.792 -0.988 -0.699 1.163 2.288
##
## Coefficients:
## Estimate Std. Error z value Pr(>|z|)
## (Intercept) -5.85785 1.53850 -3.807 0.00014 ***
## GENDER2 0.31008 0.12375 2.506 0.01222 *
## AGE 0.01056 0.02121 0.498 0.61843
## EDU 0.36722 0.04946 7.425 1.13e-13 ***
## pneoE 0.91992 0.18379 5.005 5.58e-07 ***
## pneoA 0.54418 0.20728 2.625 0.00866 **
## pneoN -0.15454 0.15521 -0.996 0.31941
## pneoO -0.13685 0.17100 -0.800 0.42354
## AS_C -0.17559 0.17061 -1.029 0.30340

```

```

## ---
## Signif. codes:  0 '***' 0.001 '**' 0.01 '*' 0.05 '.' 0.1 ' ' 1
##
## (Dispersion parameter for binomial family taken to be 1)
##
##      Null deviance: 1825.0  on 1352  degrees of freedom
## Residual deviance: 1689.2  on 1344  degrees of freedom
## (277 observations deleted due to missingness)
## AIC: 1707.2
##
## Number of Fisher Scoring iterations: 4

round(exp(cbind(OR = coef(AS), confint(AS))), 2)

## Waiting for profiling to be done...

##              OR 2.5 % 97.5 %
## (Intercept) 0.00  0.00  0.06
## GENDER2     1.36  1.07  1.74
## AGE         1.01  0.97  1.05
## EDU         1.44  1.31  1.59
## pneoE       2.51  1.76  3.61
## pneoA       1.72  1.15  2.59
## pneoN       0.86  0.63  1.16
## pneoO       0.87  0.62  1.22
## AS_C        0.84  0.60  1.17

# interaction
AS <- glm(PVol ~ AGE_C + EDU_C + GENDER + AS_C + retnetworkne + (AS_C * retnetworkne),
          data = SPAN, family = binomial)
summary(AS)

##
## Call:
## glm(formula = PVol ~ AGE_C + EDU_C + GENDER + AS_C + retnetworkne +
##      (AS_C * retnetworkne), family = binomial, data = SPAN)
##
## Deviance Residuals:
##      Min       1Q   Median       3Q      Max
## -1.4707  -1.0215  -0.7549   1.1912   2.1226
##
## Coefficients:
##              Estimate Std. Error z value Pr(>|z|)
## (Intercept)  -0.512573   0.130525  -3.927  8.6e-05 ***
## AGE_C         0.007765   0.020319   0.382  0.702347
## EDU_C         0.359456   0.043669   8.231 < 2e-16 ***
## GENDER2      0.388744   0.108635   3.578  0.000346 ***

```

```

## AS_C          0.249477  0.343755  0.726 0.467998
## reworkne1    -0.106733  0.139604 -0.765 0.444543
## reworkne2    -0.390501  0.190074 -2.054 0.039931 *
## AS_C:reworkne1 -0.338363  0.393002 -0.861 0.389255
## AS_C:reworkne2  0.348786  0.542395  0.643 0.520193
## ---
## Signif. codes:  0 '***' 0.001 '**' 0.01 '*' 0.05 '.' 0.1 ' ' 1
##
## (Dispersion parameter for binomial family taken to be 1)
##
## Null deviance: 2082.8 on 1544 degrees of freedom
## Residual deviance: 1986.1 on 1536 degrees of freedom
## (85 observations deleted due to missingness)
## AIC: 2004.1
##
## Number of Fisher Scoring iterations: 4

round(exp(cbind(OR = coef(AS), confint(AS))), 2)

## Waiting for profiling to be done...

##              OR 2.5 % 97.5 %
## (Intercept)  0.60  0.46  0.77
## AGE_C        1.01  0.97  1.05
## EDU_C        1.43  1.32  1.56
## GENDER2      1.48  1.19  1.83
## AS_C         1.28  0.65  2.53
## reworkne1    0.90  0.68  1.18
## reworkne2    0.68  0.46  0.98
## AS_C:reworkne1 0.71  0.33  1.54
## AS_C:reworkne2 1.42  0.49  4.14

# Interaction term with EDU, Gender, Age, big 5
AS <- glm(PVol ~ AGE_C + EDU_C + GENDER + AS_C + reworkne + Agree_C + Extr_C +
  Open_C + Neur_C + (AS_C * reworkne), data = SPAN, family = binomial)
summary(AS)

##
## Call:
## glm(formula = PVol ~ AGE_C + EDU_C + GENDER + AS_C + reworkne +
## Agree_C + Extr_C + Open_C + Neur_C + (AS_C * reworkne),
## family = binomial, data = SPAN)
##
## Deviance Residuals:
##   Min       1Q   Median       3Q      Max
## -1.7869 -0.9880 -0.6913  1.1469  2.4636
##

```



```

## Coefficients:
##           Estimate Std. Error z value Pr(>|z|)
## (Intercept) -0.4405837  0.1477506  -2.982  0.00286 **
## AGE_C       0.0005198  0.0223456   0.023  0.98144
## EDU_C       0.3585849  0.0514829   6.965 3.28e-12 ***
## GENDER2     0.3453277  0.1253868   2.754  0.00589 **
## AS_C        0.2536934  0.3883138   0.653  0.51355
## reworkne1  -0.2033286  0.1572075  -1.293  0.19588
## reworkne2  -0.3814576  0.2121228  -1.798  0.07213 .
## Agree_C     0.5580563  0.2089165   2.671  0.00756 **
## Extr_C      0.9488368  0.1858572   5.105 3.30e-07 ***
## Open_C     -0.1385284  0.1732334  -0.800  0.42391
## Neur_C     -0.1291930  0.1585145  -0.815  0.41506
## AS_C:reworkne1 -0.6252930  0.4432441  -1.411  0.15833
## AS_C:reworkne2  0.1431734  0.6009593   0.238  0.81169
## ---
## Signif. codes:  0 '***' 0.001 '**' 0.01 '*' 0.05 '.' 0.1 ' ' 1
##
## (Dispersion parameter for binomial family taken to be 1)
##
## Null deviance: 1792.3 on 1325 degrees of freedom
## Residual deviance: 1655.4 on 1313 degrees of freedom
## (304 observations deleted due to missingness)
## AIC: 1681.4
##
## Number of Fisher Scoring iterations: 4
round(exp(cbind(OR = coef(AS), confint(AS))), 2)

## Waiting for profiling to be done...

##           OR 2.5 % 97.5 %
## (Intercept) 0.64 0.48 0.86
## AGE_C       1.00 0.96 1.05
## EDU_C       1.43 1.30 1.58
## GENDER2     1.41 1.11 1.81
## AS_C        1.29 0.60 2.78
## reworkne1   0.82 0.60 1.11
## reworkne2   0.68 0.45 1.03
## Agree_C     1.75 1.16 2.64
## Extr_C      2.58 1.80 3.73
## Open_C     0.87 0.62 1.22
## Neur_C     0.88 0.64 1.20
## AS_C:reworkne1 0.54 0.22 1.27
## AS_C:reworkne2 1.15 0.36 3.77

# Dutifulness Duti C predict volunteering, control: EDU, AGE, GENDER

```

```

Duti <- (glm(PVol ~ EDU + GENDER + AGE + Duti_C, data = SPAN, family = "binomial"))
summary(Duti)

##
## Call:
## glm(formula = PVol ~ EDU + GENDER + AGE + Duti_C, family = "binomial",
##      data = SPAN)
##
## Deviance Residuals:
##      Min       1Q   Median       3Q      Max
## -1.4797  -1.0114  -0.7464   1.1951   2.1821
##
## Coefficients:
##              Estimate Std. Error z value Pr(>|z|)
## (Intercept) -3.10837    1.18142  -2.631  0.00851 **
## EDU          0.37453    0.04275   8.760 < 2e-16 ***
## GENDER2     0.39455    0.10775   3.662  0.00025 ***
## AGE         0.01366    0.01944   0.703  0.48220
## Duti_C      0.42484    0.16495   2.576  0.01001 *
## ---
## Signif. codes:  0 '***' 0.001 '**' 0.01 '*' 0.05 '.' 0.1 ' ' 1
##
## (Dispersion parameter for binomial family taken to be 1)
##
##      Null deviance: 2120.8  on 1574  degrees of freedom
## Residual deviance: 2013.3  on 1570  degrees of freedom
## (55 observations deleted due to missingness)
## AIC: 2023.3
##
## Number of Fisher Scoring iterations: 4

round(exp(cbind(OR = coef(Duti), confint(Duti))), 2)

## Waiting for profiling to be done...

##              OR 2.5 % 97.5 %
## (Intercept) 0.04 0.00 0.45
## EDU         1.45 1.34 1.58
## GENDER2     1.48 1.20 1.83
## AGE         1.01 0.98 1.05
## Duti_C      1.53 1.11 2.12

# C plus big 5 predict volunteer, control: EDU, AGE, GENDER
Duti <- (glm(PVol ~ GENDER + AGE + EDU + pneoE + pneoA + pneoN + pneoO + Duti_C,
            data = SPAN, family = "binomial"))
summary(Duti)

```

```

##
## Call:
## glm(formula = PVol ~ GENDER + AGE + EDU + pneoE + pneoA + pneoN +
##       pneoO + Duti_C, family = "binomial", data = SPAN)
##
## Deviance Residuals:
##      Min       1Q   Median       3Q      Max
## -1.8578  -0.9896  -0.7069   1.1538   2.3292
##
## Coefficients:
##              Estimate Std. Error z value Pr(>|z|)
## (Intercept) -5.352904   1.536537  -3.484 0.000494 ***
## GENDER2      0.327681   0.123906   2.645 0.008179 **
## AGE          0.006397   0.021197   0.302 0.762830
## EDU          0.364757   0.049763   7.330 2.30e-13 ***
## pneoE        0.849331   0.181221   4.687 2.78e-06 ***
## pneoA        0.511584   0.207025   2.471 0.013469 *
## pneoN       -0.166788   0.155735  -1.071 0.284181
## pneoO       -0.129155   0.170580  -0.757 0.448960
## Duti_C       0.143779   0.188004   0.765 0.444411
## ---
## Signif. codes:  0 '***' 0.001 '**' 0.01 '*' 0.05 '.' 0.1 ' ' 1
##
## (Dispersion parameter for binomial family taken to be 1)
##
##      Null deviance: 1826.5  on 1352  degrees of freedom
## Residual deviance: 1690.9  on 1344  degrees of freedom
## (277 observations deleted due to missingness)
## AIC: 1708.9
##
## Number of Fisher Scoring iterations: 4

round(exp(cbind(OR = coef(Duti), confint(Duti))), 2)

## Waiting for profiling to be done...

##              OR 2.5 % 97.5 %
## (Intercept) 0.00 0.00 0.09
## GENDER2     1.39 1.09 1.77
## AGE         1.01 0.97 1.05
## EDU         1.44 1.31 1.59
## pneoE       2.34 1.64 3.35
## pneoA       1.67 1.11 2.51
## pneoN       0.85 0.62 1.15
## pneoO       0.88 0.63 1.23
## Duti_C      1.15 0.80 1.67

```

```

# interaction
Duti <- glm(PVol ~ AGE_C + EDU_C + GENDER + Duti_C + retworkne + (Duti_C * retworkne),
  data = SPAN, family = binomial)
summary(Duti)

##
## Call:
## glm(formula = PVol ~ AGE_C + EDU_C + GENDER + Duti_C + retworkne +
##       (Duti_C * retworkne), family = binomial, data = SPAN)
##
## Deviance Residuals:
##      Min       1Q   Median       3Q      Max
## -1.6320  -1.0170  -0.7524   1.1912   2.2405
##
## Coefficients:
##              Estimate Std. Error z value Pr(>|z|)
## (Intercept)  -0.513634   0.131277  -3.913 9.13e-05 ***
## AGE_C         0.006382   0.020424   0.312 0.754671
## EDU_C         0.356801   0.044271   8.060 7.66e-16 ***
## GENDER2       0.411312   0.109486   3.757 0.000172 ***
## Duti_C        0.675606   0.367057   1.841 0.065680 .
## retworkne1   -0.116612   0.140609  -0.829 0.406916
## retworkne2   -0.378432   0.191542  -1.976 0.048187 *
## Duti_C:retworkne1 -0.354622   0.422050  -0.840 0.400775
## Duti_C:retworkne2 -0.282764   0.552943  -0.511 0.609085
## ---
## Signif. codes:  0 '***' 0.001 '**' 0.01 '*' 0.05 '.' 0.1 ' ' 1
##
## (Dispersion parameter for binomial family taken to be 1)
##
##      Null deviance: 2072.5  on 1534  degrees of freedom
## Residual deviance: 1966.9  on 1526  degrees of freedom
## (95 observations deleted due to missingness)
## AIC: 1984.9
##
## Number of Fisher Scoring iterations: 4

round(exp(cbind(OR = coef(Duti), confint(Duti))), 2)

## Waiting for profiling to be done...

##              OR 2.5 % 97.5 %
## (Intercept)    0.60  0.46  0.77
## AGE_C          1.01  0.97  1.05
## EDU_C          1.43  1.31  1.56
## GENDER2        1.51  1.22  1.87

```

```

## Duti_C          1.97  0.97  4.09
## reworkne1      0.89  0.68  1.17
## reworkne2      0.68  0.47  1.00
## Duti_C:reworkne1 0.70  0.30  1.59
## Duti_C:reworkne2 0.75  0.26  2.24

# Interaction term with EDU, Gender, Age, big 5
Duti <- glm(PVol ~ AGE_C + EDU_C + GENDER + Duti_C + reworkne + Agree_C + Extr_C +
  Open_C + Neur_C + (Duti_C * reworkne), data = SPAN, family = binomial)
summary(Duti)

##
## Call:
## glm(formula = PVol ~ AGE_C + EDU_C + GENDER + Duti_C + reworkne +
##     Agree_C + Extr_C + Open_C + Neur_C + (Duti_C * reworkne),
##     family = binomial, data = SPAN)
##
## Deviance Residuals:
##     Min       1Q   Median       3Q      Max
## -1.8291  -0.9950  -0.6967   1.1587   2.4724
##
## Coefficients:
##             Estimate Std. Error z value Pr(>|z|)
## (Intercept)  -0.441737   0.147542  -2.994  0.00275 **
## AGE_C        -0.002223   0.022315  -0.100  0.92065
## EDU_C         0.355063   0.051649   6.875 6.22e-12 ***
## GENDER2       0.338606   0.125755   2.693  0.00709 **
## Duti_C        0.364992   0.415934   0.878  0.38020
## reworkne1    -0.183961   0.156793  -1.173  0.24069
## reworkne2    -0.367289   0.212284  -1.730  0.08360 .
## Agree_C      0.529157   0.208364   2.540  0.01110 *
## Extr_C       0.873059   0.182788   4.776 1.79e-06 ***
## Open_C      -0.123621   0.172784  -0.715  0.47432
## Neur_C      -0.140066   0.158393  -0.884  0.37654
## Duti_C:reworkne1 -0.392223   0.475498  -0.825  0.40945
## Duti_C:reworkne2  0.092023   0.630420   0.146  0.88394
## ---
## Signif. codes:  0 '***' 0.001 '**' 0.01 '*' 0.05 '.' 0.1 ' ' 1
##
## (Dispersion parameter for binomial family taken to be 1)
##
##     Null deviance: 1792.8  on 1324  degrees of freedom
## Residual deviance: 1658.4  on 1312  degrees of freedom
##   (305 observations deleted due to missingness)
## AIC: 1684.4
##

```

```

## Number of Fisher Scoring iterations: 4
round(exp(cbind(OR = coef(Duti), confint(Duti))), 2)
## Waiting for profiling to be done...
##
##           OR 2.5 % 97.5 %
## (Intercept) 0.64 0.48 0.86
## AGE_C       1.00 0.96 1.04
## EDU_C       1.43 1.29 1.58
## GENDER2     1.40 1.10 1.80
## Duti_C      1.44 0.64 3.30
## reworkne1  0.83 0.61 1.13
## reworkne2  0.69 0.46 1.05
## Agree_C    1.70 1.13 2.56
## Extr_C     2.39 1.68 3.44
## Open_C     0.88 0.63 1.24
## Neur_C     0.87 0.64 1.19
## Duti_C:reworkne1 0.68 0.26 1.70
## Duti_C:reworkne2 1.10 0.32 3.81

# self discipline SD C predict volunteering, control: EDU, AGE, GENDER
SD <- (glm(PVol ~ EDU + GENDER + AGE + SD_C, data = SPAN, family = "binomial"))
summary(SD)

##
## Call:
## glm(formula = PVol ~ EDU + GENDER + AGE + SD_C, family = "binomial",
##      data = SPAN)
##
## Deviance Residuals:
##      Min       1Q   Median       3Q      Max
## -1.3633  -1.0099  -0.7484   1.2011   2.0283
##
## Coefficients:
##              Estimate Std. Error z value Pr(>|z|)
## (Intercept) -3.18405    1.17146  -2.718  0.00657 **
## EDU          0.37181    0.04256   8.737 < 2e-16 ***
## GENDER2     0.35076    0.10686   3.282  0.00103 **
## AGE         0.01545    0.01929   0.801  0.42302
## SD_C        0.04472    0.18873   0.237  0.81271
## ---
## Signif. codes:  0 '***' 0.001 '**' 0.01 '*' 0.05 '.' 0.1 ' ' 1
##
## (Dispersion parameter for binomial family taken to be 1)
##
##      Null deviance: 2134.9  on 1587  degrees of freedom

```

```

## Residual deviance: 2041.9 on 1583 degrees of freedom
## (42 observations deleted due to missingness)
## AIC: 2051.9
##
## Number of Fisher Scoring iterations: 4

round(exp(cbind(OR = coef(SD), confint(SD))), 2)

## Waiting for profiling to be done...

##          OR 2.5 % 97.5 %
## (Intercept) 0.04 0.00 0.41
## EDU          1.45 1.34 1.58
## GENDER2     1.42 1.15 1.75
## AGE         1.02 0.98 1.05
## SD_C        1.05 0.72 1.51

# C plus big 5 predict volunteer, control: EDU, AGE, GENDER
SD <- (glm(PVol ~ GENDER + AGE + EDU + pneoE + pneoA + pneoN + pneoO + SD_C,
  data = SPAN, family = "binomial"))
summary(SD)

##
## Call:
## glm(formula = PVol ~ GENDER + AGE + EDU + pneoE + pneoA + pneoN +
##     pneoO + SD_C, family = "binomial", data = SPAN)
##
## Deviance Residuals:
##      Min       1Q   Median       3Q      Max
## -1.8083  -0.9901  -0.7075   1.1594   2.2762
##
## Coefficients:
##              Estimate Std. Error z value Pr(>|z|)
## (Intercept) -5.662394   1.529078  -3.703 0.000213 ***
## GENDER2     0.321031   0.123702   2.595 0.009454 **
## AGE         0.009808   0.021203   0.463 0.643670
## EDU         0.372116   0.049870   7.462 8.54e-14 ***
## pneoE       0.859507   0.181181   4.744 2.10e-06 ***
## pneoA       0.526029   0.207091   2.540 0.011082 *
## pneoN      -0.195088   0.157477  -1.239 0.215408
## pneoO      -0.106134   0.170721  -0.622 0.534152
## SD_C       -0.136623   0.215701  -0.633 0.526480
## ---
## Signif. codes:  0 '***' 0.001 '**' 0.01 '*' 0.05 '.' 0.1 ' ' 1
##
## (Dispersion parameter for binomial family taken to be 1)
##

```

```

## Null deviance: 1827.8 on 1354 degrees of freedom
## Residual deviance: 1693.0 on 1346 degrees of freedom
## (275 observations deleted due to missingness)
## AIC: 1711
##
## Number of Fisher Scoring iterations: 4

round(exp(cbind(OR = coef(SD), confint(SD))), 2)

## Waiting for profiling to be done...

## OR 2.5 % 97.5 %
## (Intercept) 0.00 0.00 0.07
## GENDER2 1.38 1.08 1.76
## AGE 1.01 0.97 1.05
## EDU 1.45 1.32 1.60
## pneoE 2.36 1.66 3.38
## pneoA 1.69 1.13 2.54
## pneoN 0.82 0.60 1.12
## pneoO 0.90 0.64 1.26
## SD_C 0.87 0.57 1.33

# interaction
SD <- glm(PVol ~ AGE_C + EDU_C + GENDER + SD_C + retworkne + (SD_C * retworkne),
  data = SPAN, family = binomial)
summary(SD)

##
## Call:
## glm(formula = PVol ~ AGE_C + EDU_C + GENDER + SD_C + retworkne +
## (SD_C * retworkne), family = binomial, data = SPAN)
##
## Deviance Residuals:
## Min 1Q Median 3Q Max
## -1.4667 -1.0178 -0.7647 1.1970 2.1143
##
## Coefficients:
## Estimate Std. Error z value Pr(>|z|)
## (Intercept) -0.505554 0.129868 -3.893 9.91e-05 ***
## AGE_C 0.009228 0.020310 0.454 0.649569
## EDU_C 0.352092 0.043924 8.016 1.09e-15 ***
## GENDER2 0.379766 0.108359 3.505 0.000457 ***
## SD_C 0.428971 0.451031 0.951 0.341559
## retworkne1 -0.101352 0.139126 -0.728 0.466316
## retworkne2 -0.374797 0.189140 -1.982 0.047525 *
## SD_C:retworkne1 -0.562929 0.505362 -1.114 0.265317
## SD_C:retworkne2 -0.030066 0.684459 -0.044 0.964962

```



```

## ---
## Signif. codes:  0 '***' 0.001 '**' 0.01 '*' 0.05 '.' 0.1 ' ' 1
##
## (Dispersion parameter for binomial family taken to be 1)
##
##      Null deviance: 2089.5  on 1549  degrees of freedom
## Residual deviance: 1996.1  on 1541  degrees of freedom
## (80 observations deleted due to missingness)
## AIC: 2014.1
##
## Number of Fisher Scoring iterations: 4

round(exp(cbind(OR = coef(SD), confint(SD))), 2)

## Waiting for profiling to be done...

##              OR 2.5 % 97.5 %
## (Intercept)   0.60  0.47  0.78
## AGE_C         1.01  0.97  1.05
## EDU_C         1.42  1.31  1.55
## GENDER2       1.46  1.18  1.81
## SD_C          1.54  0.64  3.75
## reworkne1     0.90  0.69  1.19
## reworkne2     0.69  0.47  0.99
## SD_C:reworkne1 0.57  0.21  1.53
## SD_C:reworkne2 0.97  0.25  3.74

# Interaction term with EDU, Gender, Age, big 5
SD <- glm(PVol ~ AGE_C + EDU_C + GENDER + SD_C + reworkne + Agree_C + Extr_C +
  Open_C + Neur_C + (SD_C * reworkne), data = SPAN, family = binomial)
summary(SD)

##
## Call:
## glm(formula = PVol ~ AGE_C + EDU_C + GENDER + SD_C + reworkne +
##      Agree_C + Extr_C + Open_C + Neur_C + (SD_C * reworkne),
##      family = binomial, data = SPAN)
##
## Deviance Residuals:
##      Min       1Q   Median       3Q      Max
## -1.8044  -0.9969  -0.6975   1.1568   2.3845
##
## Coefficients:
##              Estimate Std. Error z value Pr(>|z|)
## (Intercept)  -0.433620   0.147322  -2.943  0.00325 **
## AGE_C         0.001769   0.022366   0.079  0.93696
## EDU_C         0.360399   0.051664   6.976 3.04e-12 ***

```

```

## GENDER2      0.349108  0.125011  2.793  0.00523 **
## SD_C         0.429244  0.513411  0.836  0.40312
## reworkne1   -0.204396  0.156717  -1.304  0.19215
## reworkne2   -0.394868  0.212400  -1.859  0.06302 .
## Agree_C     0.536678  0.208403  2.575  0.01002 *
## Extr_C      0.887487  0.182800  4.855  1.20e-06 ***
## Open_C     -0.096782  0.173183  -0.559  0.57627
## Neur_C     -0.172028  0.160300  -1.073  0.28320
## SD_C:reworkne1 -0.757915  0.572717  -1.323  0.18571
## SD_C:reworkne2 -0.427695  0.767416  -0.557  0.57731
## ---
## Signif. codes:  0 '***' 0.001 '**' 0.01 '*' 0.05 '.' 0.1 ' ' 1
##
## (Dispersion parameter for binomial family taken to be 1)
##
## Null deviance: 1795.2 on 1327 degrees of freedom
## Residual deviance: 1660.6 on 1315 degrees of freedom
## (302 observations deleted due to missingness)
## AIC: 1686.6
##
## Number of Fisher Scoring iterations: 4

round(exp(cbind(OR = coef(SD), confint(SD))), 2)

## Waiting for profiling to be done...

##           OR 2.5 % 97.5 %
## (Intercept) 0.65 0.48 0.86
## AGE_C       1.00 0.96 1.05
## EDU_C       1.43 1.30 1.59
## GENDER2     1.42 1.11 1.81
## SD_C        1.54 0.57 4.26
## reworkne1   0.82 0.60 1.11
## reworkne2   0.67 0.44 1.02
## Agree_C     1.71 1.14 2.58
## Extr_C      2.43 1.70 3.49
## Open_C      0.91 0.65 1.27
## Neur_C      0.84 0.61 1.15
## SD_C:reworkne1 0.47 0.15 1.43
## SD_C:reworkne2 0.65 0.14 2.95

# Delib C predict volunteering, control: EDU, AGE, GENDER
Delib <- (glm(PVol ~ EDU + GENDER + AGE + Delib_C, data = SPAN, family = "binomial"))
summary(Delib)

##
## Call:

```

```

## glm(formula = PVol ~ EDU + GENDER + AGE + Delib_C, family = "binomial",
##     data = SPAN)
##
## Deviance Residuals:
##   Min       1Q   Median       3Q      Max
## -1.362  -1.013  -0.744   1.198   2.040
##
## Coefficients:
##             Estimate Std. Error z value Pr(>|z|)
## (Intercept) -3.222849   1.168254  -2.759 0.005803 **
## EDU          0.380071   0.042060   9.036 < 2e-16 ***
## GENDER2     0.379452   0.107003   3.546 0.000391 ***
## AGE         0.015414   0.019249   0.801 0.423256
## Delib_C     -0.002938   0.171816  -0.017 0.986355
## ---
## Signif. codes:  0 '***' 0.001 '**' 0.01 '*' 0.05 '.' 0.1 ' ' 1
##
## (Dispersion parameter for binomial family taken to be 1)
##
##   Null deviance: 2142.8  on 1590  degrees of freedom
## Residual deviance: 2045.9  on 1586  degrees of freedom
##   (39 observations deleted due to missingness)
## AIC: 2055.9
##
## Number of Fisher Scoring iterations: 4

round(exp(cbind(OR = coef(Delib), confint(Delib))), 2)

## Waiting for profiling to be done...

##             OR 2.5 % 97.5 %
## (Intercept) 0.04 0.00 0.39
## EDU         1.46 1.35 1.59
## GENDER2     1.46 1.19 1.80
## AGE         1.02 0.98 1.05
## Delib_C     1.00 0.71 1.40

# C plus big 5 predict volunteer, control: EDU, AGE, GENDER
Delib <- (glm(PVol ~ GENDER + AGE + EDU + pneoE + pneoA + pneoN + pneoO + Delib_C,
             data = SPAN, family = "binomial"))
summary(Delib)

##
## Call:
## glm(formula = PVol ~ GENDER + AGE + EDU + pneoE + pneoA + pneoN +
##     pneoO + Delib_C, family = "binomial", data = SPAN)

```

```

##
## Deviance Residuals:
##      Min       1Q   Median       3Q      Max
## -1.8651  -0.9866  -0.6983   1.1567   2.3106
##
## Coefficients:
##              Estimate Std. Error z value Pr(>|z|)
## (Intercept) -5.767997   1.532329  -3.764 0.000167 ***
## GENDER2     0.308475   0.123880   2.490 0.012771 *
## AGE         0.008903   0.021179   0.420 0.674213
## EDU         0.366037   0.049415   7.407 1.29e-13 ***
## pneoE       0.873640   0.181359   4.817 1.46e-06 ***
## pneoA       0.561374   0.207203   2.709 0.006743 **
## pneoN      -0.168140   0.155252  -1.083 0.278804
## pneoO      -0.094256   0.171668  -0.549 0.582962
## Delib_C    -0.265323   0.199631  -1.329 0.183827
## ---
## Signif. codes:  0 '***' 0.001 '**' 0.01 '*' 0.05 '.' 0.1 ' ' 1
##
## (Dispersion parameter for binomial family taken to be 1)
##
##      Null deviance: 1829.4  on 1354  degrees of freedom
## Residual deviance: 1692.3  on 1346  degrees of freedom
## (275 observations deleted due to missingness)
## AIC: 1710.3
##
## Number of Fisher Scoring iterations: 4
round(exp(cbind(OR = coef(Delib), confint(Delib))), 2)

## Waiting for profiling to be done...
##              OR 2.5 % 97.5 %
## (Intercept) 0.00 0.00  0.06
## GENDER2     1.36 1.07  1.74
## AGE         1.01 0.97  1.05
## EDU         1.44 1.31  1.59
## pneoE       2.40 1.68  3.43
## pneoA       1.75 1.17  2.64
## pneoN       0.85 0.62  1.15
## pneoO       0.91 0.65  1.27
## Delib_C     0.77 0.52  1.13

# interaction
Delib <- glm(PVol ~ AGE_C + EDU_C + GENDER + Delib_C + retworkne + (Delib_C *
  retworkne), data = SPAN, family = binomial)
summary(Delib)

```

```

##
## Call:
## glm(formula = PVol ~ AGE_C + EDU_C + GENDER + Delib_C + reworkne +
##       (Delib_C * reworkne), family = binomial, data = SPAN)
##
## Deviance Residuals:
##      Min       1Q   Median       3Q      Max
## -1.4689  -1.0219  -0.7555   1.1878   2.0726
##
## Coefficients:
##              Estimate Std. Error z value Pr(>|z|)
## (Intercept)  -0.494419   0.129698  -3.812 0.000138 ***
## AGE_C         0.007317   0.020254   0.361 0.717912
## EDU_C         0.357789   0.043590   8.208 2.25e-16 ***
## GENDER2       0.404553   0.108606   3.725 0.000195 ***
## Delib_C       0.367998   0.382905   0.961 0.336517
## reworkne1     -0.123852   0.138840  -0.892 0.372366
## reworkne2     -0.408077   0.188727  -2.162 0.030598 *
## Delib_C:reworkne1 -0.386193   0.438224  -0.881 0.378173
## Delib_C:reworkne2 -0.866607   0.620063  -1.398 0.162230
## ---
## Signif. codes:  0 '***' 0.001 '**' 0.01 '*' 0.05 '.' 0.1 ' ' 1
##
## (Dispersion parameter for binomial family taken to be 1)
##
##      Null deviance: 2094.5  on 1550  degrees of freedom
## Residual deviance: 1996.5  on 1542  degrees of freedom
## (79 observations deleted due to missingness)
## AIC: 2014.5
##
## Number of Fisher Scoring iterations: 4

round(exp(cbind(OR = coef(Delib), confint(Delib))), 2)

## Waiting for profiling to be done...

##              OR 2.5 % 97.5 %
## (Intercept)    0.61 0.47  0.79
## AGE_C          1.01 0.97  1.05
## EDU_C          1.43 1.31  1.56
## GENDER2        1.50 1.21  1.86
## Delib_C        1.44 0.69  3.09
## reworkne1      0.88 0.67  1.16
## reworkne2      0.66 0.46  0.96
## Delib_C:reworkne1 0.68 0.29  1.60
## Delib_C:reworkne2 0.42 0.12  1.41

```

```

# Interaction term with EDU, Gender, Age, big 5
Delib <- glm(PVol ~ AGE_C + EDU_C + GENDER + Delib_C + retworkne + Agree_C +
  Extr_C + Open_C + Neur_C + (Delib_C * retworkne), data = SPAN, family = binomial)
summary(Delib)

##
## Call:
## glm(formula = PVol ~ AGE_C + EDU_C + GENDER + Delib_C + retworkne +
##   Agree_C + Extr_C + Open_C + Neur_C + (Delib_C * retworkne),
##   family = binomial, data = SPAN)
##
## Deviance Residuals:
##   Min       1Q   Median       3Q      Max
## -1.8692  -0.9991  -0.6960   1.1528   2.2794
##
## Coefficients:
##              Estimate Std. Error z value Pr(>|z|)
## (Intercept)  -0.419860   0.147095  -2.854  0.00431 **
## AGE_C        -0.001352   0.022319  -0.061  0.95171
## EDU_C         0.353306   0.051274   6.891 5.56e-12 ***
## GENDER2      0.336826   0.125356   2.687  0.00721 **
## Delib_C      0.051187   0.455677   0.112  0.91056
## retworkne1  -0.213384   0.156638  -1.362  0.17311
## retworkne2  -0.400061   0.212894  -1.879  0.06022 .
## Agree_C      0.571835   0.208673   2.740  0.00614 **
## Extr_C       0.875048   0.182669   4.790 1.66e-06 ***
## Open_C      -0.100241   0.173915  -0.576  0.56436
## Neur_C      -0.145519   0.158293  -0.919  0.35794
## Delib_C:retworkne1 -0.243054   0.513490  -0.473  0.63597
## Delib_C:retworkne2 -1.028944   0.735885  -1.398  0.16204
## ---
## Signif. codes:  0 '***' 0.001 '**' 0.01 '*' 0.05 '.' 0.1 ' ' 1
##
## (Dispersion parameter for binomial family taken to be 1)
##
##   Null deviance: 1795.6  on 1326  degrees of freedom
## Residual deviance: 1658.7  on 1314  degrees of freedom
##   (303 observations deleted due to missingness)
## AIC: 1684.7
##
## Number of Fisher Scoring iterations: 4
round(exp(cbind(OR = coef(Delib), confint(Delib))), 2)

## Waiting for profiling to be done...
##
## OR 2.5 % 97.5 %

```

```

## (Intercept)      0.66  0.49  0.88
## AGE_C            1.00  0.96  1.04
## EDU_C            1.42  1.29  1.58
## GENDER2          1.40  1.10  1.79
## Delib_C          1.05  0.43  2.59
## reworkne1        0.81  0.59  1.10
## reworkne2        0.67  0.44  1.01
## Agree_C          1.77  1.18  2.67
## Extr_C           2.40  1.68  3.44
## Open_C           0.90  0.64  1.27
## Neur_C           0.86  0.63  1.18
## Delib_C:reworkne1 0.78  0.29  2.14
## Delib_C:reworkne2 0.36  0.08  1.49

##### Test simple slopes for base C interaction #####
tempwork <- SPAN$reworkne
mat = matrix(c(0, 0, 1, 1, 0, 0), ncol = 2) #contrasts for retired as 0
mat = matrix(c(0, 1, 0, 0, 0, 1), ncol = 2) #contrast with unemployed as 0
mat = matrix(c(0, 1, 0, 1, 0, 0), ncol = 2) # contrasts with working as 0
mat

##      [,1] [,2]
## [1,]  0   1
## [2,]  1   0
## [3,]  0   0

contrasts(tempwork) <- mat
contrasts(tempwork)

##      [,1] [,2]
## NE      0   1
## retired  1   0
## working  0   0

tempworkreg <- glm(PVol ~ AGE_C + EDU_C + GENDER + Con_C + tempwork + Agree_C +
  Extr_C + Open_C + Neur_C + (Con_C * tempwork), data = SPAN, family = binomial)
summary(tempworkreg)

##
## Call:
## glm(formula = PVol ~ AGE_C + EDU_C + GENDER + Con_C + tempwork +
##     Agree_C + Extr_C + Open_C + Neur_C + (Con_C * tempwork),
##     family = binomial, data = SPAN)
##
## Deviance Residuals:
##      Min       1Q   Median       3Q      Max
## -2.0017  -0.9944  -0.6814   1.1475   2.5080

```

```

##
## Coefficients:
##           Estimate Std. Error z value Pr(>|z|)
## (Intercept) -0.629977  0.104257  -6.043 1.52e-09 ***
## AGE_C       0.003924  0.022471   0.175  0.86137
## EDU_C       0.370345  0.052752   7.021 2.21e-12 ***
## GENDER2     0.351502  0.126394   2.781  0.00542 **
## Con_C      -0.613551  0.239888  -2.558  0.01054 *
## tempwork1   0.197745  0.159067   1.243  0.21381
## tempwork2  -0.135116  0.184071  -0.734  0.46292
## Agree_C     0.579250  0.209978   2.759  0.00580 **
## Extr_C      0.974420  0.187836   5.188 2.13e-07 ***
## Open_C     -0.157474  0.174614  -0.902  0.36714
## Neur_C     -0.217337  0.180339  -1.205  0.22814
## Con_C:tempwork1  1.105190  0.454946   2.429  0.01513 *
## Con_C:tempwork2  1.131503  0.510302   2.217  0.02660 *
## ---
## Signif. codes:  0 '***' 0.001 '**' 0.01 '*' 0.05 '.' 0.1 ' ' 1
##
## (Dispersion parameter for binomial family taken to be 1)
##
##      Null deviance: 1768.7  on 1306  degrees of freedom
## Residual deviance: 1628.0  on 1294  degrees of freedom
## (323 observations deleted due to missingness)
## AIC: 1654
##
## Number of Fisher Scoring iterations: 4

round(exp(cbind(OR = coef(tempworkreg), confint(tempworkreg))), 2)

## Waiting for profiling to be done...

##           OR 2.5 % 97.5 %
## (Intercept)  0.53  0.43  0.65
## AGE_C       1.00  0.96  1.05
## EDU_C       1.45  1.31  1.61
## GENDER2     1.42  1.11  1.82
## Con_C       0.54  0.34  0.87
## tempwork1   1.22  0.89  1.66
## tempwork2   0.87  0.61  1.25
## Agree_C     1.78  1.18  2.70
## Extr_C      2.65  1.84  3.84
## Open_C      0.85  0.61  1.20
## Neur_C      0.80  0.56  1.14
## Con_C:tempwork1 3.02  1.26  7.51
## Con_C:tempwork2 3.10  1.17  8.71

```



```

### No Controls (Big 5)
tempworkreg <- glm(PVol ~ AGE_C + EDU_C + GENDER + Con_C + tempwork + (Con_C *
  tempwork), data = SPAN, family = binomial)
summary(tempworkreg)

##
## Call:
## glm(formula = PVol ~ AGE_C + EDU_C + GENDER + Con_C + tempwork +
##       (Con_C * tempwork), family = binomial, data = SPAN)
##
## Deviance Residuals:
##      Min       1Q   Median       3Q      Max
## -1.6655  -1.0150  -0.7511   1.2019   2.0890
##
## Coefficients:
##              Estimate Std. Error z value Pr(>|z|)
## (Intercept)  -0.638430  0.095292  -6.700 2.09e-11 ***
## AGE_C         0.004608  0.020815   0.221 0.824805
## EDU_C         0.341416  0.045618   7.484 7.19e-14 ***
## GENDER2       0.433067  0.111553   3.882 0.000104 ***
## Con_C         0.063756  0.189665   0.336 0.736757
## tempwork1     0.165857  0.144416   1.148 0.250775
## tempwork2    -0.201573  0.168764  -1.194 0.232318
## Con_C:tempwork1 0.745258  0.407591   1.828 0.067483 .
## Con_C:tempwork2 0.924603  0.467307   1.979 0.047864 *
## ---
## Signif. codes:  0 '***' 0.001 '**' 0.01 '*' 0.05 '.' 0.1 ' ' 1
##
## (Dispersion parameter for binomial family taken to be 1)
##
##      Null deviance: 1982.3  on 1465  degrees of freedom
## Residual deviance: 1884.0  on 1457  degrees of freedom
##   (164 observations deleted due to missingness)
## AIC: 1902
##
## Number of Fisher Scoring iterations: 4

round(exp(cbind(OR = coef(tempworkreg), confint(tempworkreg))), 2)

## Waiting for profiling to be done...

##              OR 2.5 % 97.5 %
## (Intercept)   0.53 0.44  0.64
## AGE_C         1.00 0.96  1.05
## EDU_C         1.41 1.29  1.54
## GENDER2       1.54 1.24  1.92

```

|                    |      |      |      |
|--------------------|------|------|------|
| ## Con_C           | 1.07 | 0.74 | 1.55 |
| ## tempwork1       | 1.18 | 0.89 | 1.57 |
| ## tempwork2       | 0.82 | 0.59 | 1.14 |
| ## Con_C:tempwork1 | 2.11 | 0.96 | 4.75 |
| ## Con_C:tempwork2 | 2.52 | 1.03 | 6.47 |
